1 **Intracellular XBP1-IL-24 axis dismantles cytotoxic unfolded protein response in the liver**

2 Jianye Wang<sup>1,7</sup>, Bian Hu<sup>4,7</sup>, Zhicong Zhao<sup>1</sup>, Haiyan Zhang<sup>3</sup>, He Zhang<sup>1,6</sup>, Zhenjun Zhao<sup>1</sup>, Xiong Ma<sup>3</sup>,  
3 Bin Shen<sup>5</sup>, Beicheng Sun<sup>2</sup>, Xingxu Huang<sup>4\*</sup>, Jiajie Hou<sup>1,2\*</sup> & Qiang Xia<sup>1\*</sup>

4 <sup>1</sup>Department of Liver Surgery, Renji Hospital, School of Medicine, Shanghai Jiaotong University,  
5 Shanghai, China

6 <sup>2</sup>Department of Hepatobiliary Surgery, The Affiliated Drum Tower Hospital of Nanjing University Medical  
7 School, Nanjing, China

8 <sup>3</sup>Division of Gastroenterology and Hepatology, Key Laboratory of Gastroenterology and Hepatology,  
9 Ministry of Health; State Key Laboratory for Oncogenes and Related Genes, Renji Hospital; School of  
10 Medicine, Shanghai Jiao Tong University; and Shanghai Institute of Digestive Disease, Shanghai, China

11 <sup>4</sup>School of Life Science and Technology, ShanghaiTech University, Shanghai 201210, China

12 <sup>5</sup>State Key Laboratory of Reproductive Medicine, Department of Histology and Embryology, Nanjing  
13 Medical University, Nanjing, China

14 <sup>6</sup>Department of Surgery, The University of Hong Kong-Shenzhen Hospital, Shenzhen 518053, China

15 <sup>7</sup>These authors contributed equally

16 **\*Correspondence**

17 Prof. Xingxu Huang: Phone: +86-21-20685028. Email: [huangxx@shanghaitech.edu.cn](mailto:huangxx@shanghaitech.edu.cn)

18 Prof. Jiajie Hou: Phone: + 86-25-83105892. Email: [jethou0821@hotmail.com](mailto:jethou0821@hotmail.com)

19 Prof. Qiang Xia: Phone: +86-21-58752345. Email: [xiaqiang@shsmu.edu.cn](mailto:xiaqiang@shsmu.edu.cn)

20 **Key words:** IL-24, ER stress, Liver injury, XBP1, CHOP

21 **Running Title:** Intrinsic IL-24 inhibits liver injury

22 **Numbers of Figures and tables:** 7 main Figures, 0 table and 7 Expanded View Figures

23 **Abbreviations:** IL-24, interleukin 24; ER, endoplasmic reticulum; UPR, unfolded protein response;  
24 PERK, protein kinase RNA like ER kinase; IRE1, inositol-requiring enzyme 1; XBP1, X-box binding  
25 protein; ATF6, activating transcription factor 6; CHOP, transcription factor C/EBP homologous  
26 protein; GRP78, glucose-regulated protein 78; Tm, tunicamycin; ALT, alanine aminotransferase;  
27 AST, aspartate aminotransferase; CRISPR/Cas9, clustered regularly interspersed short  
28 palindromic repeats / CRISPR associated protein 9; ISRIB, inhibitor of the integrated stress  
29 response, AAV, adeno-associated virus; ALF, acute liver failure

30 **Financial support statement**

31 National Natural Science Foundation of China (81672801 to J.H., 81670598 to Q.X. and 81700498 to  
32 Haiyan Z.), Chen Guang Project in Shanghai Municipal Education Commission and Shanghai  
33 Education Development Foundation (15CG13 to J.H. and 17CG10 to Haiyan Z.) and National Key  
34 Research and Development Program of China (2016YFC0905901 to X.H.).

35

36

37

38

39

40

41

42

43

44

45 **Abstract**

46 Endoplasmic reticulum (ER) stress-associated cell death is prevalent in various liver diseases.  
47 However, the determinant mechanism how hepatocytes survive unresolved stress was still unclear.  
48 Interleukin-24 (IL-24) was previously found to promote ER stress-mediated cell death, and yet its  
49 expression and function in the liver remained elusive. Here we identified an anti-apoptotic role of IL-24,  
50 which transiently accumulated within ER-stressed hepatocytes in a X-box binding protein 1 (XBP1)-  
51 dependent manner. Disruption of IL-24 increased cell death in the CCL<sub>4</sub>- or APAP-challenged mouse  
52 liver or Tm-treated hepatocytes. In contrast, pharmaceutical blockade of eukaryotic initiation factor 2 $\alpha$   
53 (eIF2 $\alpha$ ) or genetical ablation of C/EBP homologous protein (CHOP) restored hepatocyte function in the  
54 absence of IL-24. In a clinical setting, patients with acute liver failure manifested a profound decrease  
55 of hepatic IL-24 expression, which was associated with disease progression. In conclusion, intrinsic  
56 hepatocyte IL-24 maintains ER homeostasis by restricting the eIF2 $\alpha$ -CHOP pathway-mediated stress  
57 signal, which might be exploited as a bio-index for prognosis or therapeutic intervention in patients with  
58 liver injury.

59

60

61

62

63

64

65

66

## 67 **Introduction**

68 The liver, one of the most vital organs in metabolic homeostasis, has a unique potential to fully recover  
69 from acute liver injury. Despite recent studies elucidating various molecular pathways involved in liver  
70 damage [1], a further understanding of the pivotal life-and-death decision mechanism is needed to  
71 improve current therapeutics. Endoplasmic reticulum (ER) content is rich in hepatocytes and  
72 participates in the processes of synthesizing, folding and trafficking of proteins [2, 3]. Environmental  
73 stimuli or nutrient fluctuations disrupt the ER protein-folding procedure, referred to as ER stress [4].  
74 With an accumulation of misfolded proteins in ER lumen, the unfolded protein response (UPR), a  
75 collection of intracellular signal pathways, is activated to increase protein-folding capacity and reduce  
76 global protein synthesis. Once the molecular adaption fails in resolving the protein-folding defect,  
77 hepatocytes enter persistent ER stress, which results in apoptosis[5]. ER stress-related apoptosis has  
78 been found in fatty liver disease, viral hepatitis, and alcohol or drug induced liver injury [3, 6, 7]. The  
79 transcription factor C/EBP homologous protein (CHOP) mediates the most well-characterized pro-  
80 apoptotic pathway resulted from unresolved ER stress. CHOP induces the expression of pro-apoptotic  
81 BH3-only protein Bim, the cell surface death receptor TRAIL receptor 2, and inhibits Bcl2 transcription  
82 [8-11]. As previously reported, CHOP-deficient mice were protected from acetaminophen (APAP)-  
83 induced liver damage and conferred a survival advantage [12].

84 Interleukin-24 (IL-24) was first identified as a negative regulator in human melanocytes[13, 14]. As  
85 an IL-10 superfamily member, IL-24 has been reported to exert a bystander anti-cancer function, but  
86 has no deleterious effect toward non-cancerous cell [13, 15-17]. Like other secretory proteins, IL-24  
87 precursor, which is 206 amino acids in length, translocates to the ER lumen before it proceeds to the  
88 secretory pathway. Independently of its cognate receptors, adenovirus-mediated IL-24 overexpression

89 in melanoma cells led to induction of apoptosis by interaction with glucose-regulated protein 78  
90 (GRP78) and upregulation of GADD family genes, including CHOP [18, 19]. Nonetheless, little is known  
91 about IL-24 expression and its correlation with ER stress in non-cancerous cells. Interestingly, IL-24  
92 production was elevated in diabetic pancreatic islets, where it induced beta cell ER stress and impaired  
93 glucose tolerance [20]. But it remains unclear whether IL-24 adapts ER homeostasis in epithelial cells.

94 Given the abundant IL-24 expression in the normal mouse or human liver detected in our preliminary  
95 experiments, the role of hepatocyte IL-24 in liver diseases has yet to be deciphered. To search for a  
96 possible link between IL-24 and ER stress within hepatocytes, we employed two mouse models  
97 characterizing IL-24 in the duration of acute liver injury. Unexpectedly, IL-24 deficiency did not alleviate  
98 liver damage but sensitized ER stressed hepatocytes to death. By monitoring tunicamycin (Tm)-  
99 stimulated mouse hepatocytes *in vitro* or manipulating the IL-24 level or UPR pathway *in vivo*, we further  
100 confirmed anti-apoptotic function of intracellular IL-24. Indeed, we revealed that hepatocyte IL-24  
101 governs the intrinsic adaption to ER stress by control of PERK-eIF2 $\alpha$ -CHOP pathway. Collectively,  
102 these results highlight profound implications for understanding hepatocyte ER homeostasis and identify  
103 IL-24 as a critical anti-stress factor in the liver.

## 104 **Results**

### 105 **Hepatocyte IL-24 transiently increases during ER stress-related acute liver injury.**

106 Firstly, we detected the expression of IL-24 among different organs in normal wild type (WT) mice and  
107 found it was most highly expressed in the liver (Expanded View Fig. 1A). To explore whether liver IL-  
108 24 is linked to ER stress, we treated WT mice with a single dose of CCL<sub>4</sub> (2ml/kg) as reported  
109 previously<sup>19</sup>. Serum levels of alanine aminotransferase (ALT) and aspartate aminotransferase (AST)  
110 were markedly elevated and peaked at 48 h post treatment, then returned to baseline at 72 h time point

111 (Expanded View Fig. 1B). In context, exposure to CCL<sub>4</sub> unaffected the ER chaperon GRP78 but  
112 tremendously evoked CHOP expression in the liver (Fig. 1A&B). Noticeably, IL-24 mRNA level was  
113 transiently increased at 24 h, then decreased and reverted to normal level 72 h post CCL<sub>4</sub>  
114 administration. A same trend was observed in IL-24 protein level (Fig. 1A). Regarding the potential  
115 inflammatory responses caused by CCL<sub>4</sub>, we also measured the serum IL-24 protein level.  
116 Nonetheless, CCL<sub>4</sub>-treated mice exhibited undetectable serum IL-24, which was comparable to that in  
117 none-treated WT or IL-24 KO mice (data not show). Given the fact that hepatocytes take up the majority  
118 of hepatic cells, we asked whether the fluctuation of IL-24 expression was occurred in ER stressed-  
119 hepatocytes. To answer this question, we investigated IL-24 expression in murine hepatocyte cell line  
120 AML12 in the presence of an ER stress inducer Tm. Consistent with the *in vivo* observation, a transient  
121 increase of IL-24 level was recapitulated in AML12 upon ER stress, as accompanied by accumulating  
122 CHOP expression. These results suggested a potential role of non-secreted IL-24 and prompted us to  
123 understand how IL-24 was involved in hepatocyte ER stress.

124 The transcription factors activating transcription factor 4 (ATF4), ATF6, sliced X-box binding protein  
125 1 (sXBP1) and CHOP regulate UPR-related gene expression[5]. Like CHOP, other three molecules  
126 were also upregulated in the CCL<sub>4</sub>-exposed mouse liver or ER stressed-AML12 cells, among which  
127 sXBP1 was the first to peak (Expanded View Fig. 1C&D). Intriguingly, the murine *Il24* promoter harbors  
128 conserved binding motifs for ATF6/XBP1 and CHOP [21, 22](Expanded View Fig. 2A). To explore how  
129 IL-24 expression was affected in response to ER stress, we transfected AML12 cells with small  
130 interfering RNAs (siRNAs) targeting ATF4, ATF6, XBP1 and CHOP prior to Tm stimulation. IL-24 mRNA  
131 levels in these siRNA-expressing cells all decreased as compare to the negative control (NC)  
132 (Expanded View Fig. 2B), suggesting a regulatory relation between hepatocyte IL-24 and UPR

133 pathways. Importantly, siXBP1 most significantly inhibited IL-24 mRNA level and blocked its  
134 upregulation in response to ER stress. Silencing of XBP1 (but not CHOP or ATF6) repressed IL-24  
135 protein level as well as *Il24 promoter* activity in Tm-stimulated AML12 cells (Fig. 1E&F and Expanded  
136 View Fig. 2C). Furthermore, we isolated primary hepatocytes from conditional XBP1 KO (*Xbp1<sup>flw</sup>;Alb<sup>Cre</sup>*)  
137 mice. XBP1 depletion unaffected cell viability under ER stress, but reduced IL-24 in both mRNA and  
138 protein levels (Expanded View Fig. 2D-F).

### 139 **Hepatocyte IL-24 deficiency promotes ER stress-related liver injury.**

140 To further dissect the underlying impact of IL-24 fluctuation, IL-24 KO mice, in which 3306 bp of IL-24  
141 allele was depleted, were subjected to CCL<sub>4</sub>-induced liver injury. In comparison to the WT mice, IL-24-  
142 null littermates were more susceptible to CCL<sub>4</sub>-induced liver injury, exhibiting a relatively higher ALT  
143 and AST level and a lower survival rate (Fig. 2A&B). The exacerbated liver damage in IL-24-null mice  
144 was visualized by hematoxylin and eosin (H&E). Meanwhile, a marked increase in the percentage of  
145 terminal deoxynucleotidyl transferase dUTP nick end labeling (TUNEL)-positive hepatocyte was  
146 observed in IL-24-null mice with respect to WT mice (Fig. 2C&D). Besides, proliferating cell nuclear  
147 antigen (PCNA) staining showed an increase of cell proliferation in IL-24 KO mice (Expanded View Fig.  
148 3A), possibly due to compensatory liver regeneration. We then checked the inflammatory status and  
149 detected higher IL1A and IL6 and lower TNFA mRNA expression in the IL-24-deficient mouse liver  
150 (Expanded View Fig. 3B). Overdose of APAP, an analgesic and antipyretic drug, is the leading cause  
151 of drug-induced acute liver injury [23]. Accordingly, we subjected IL-24-null mice to oral administration  
152 of APAP, which was evident for inducing ER stress-related liver damage [12]. In context, worse liver  
153 function and survival rate and extensive hepatocyte death were manifested in IL-24-deficient group  
154 (Expanded View Fig. 3C-E). Given the possibility that the extracellular IL-24 might be implicated in liver

155 injury, we treated WT mice with recombinant IL-24 (rIL-24) one hour before administration with CCL<sub>4</sub>.  
156 Nonetheless, the levels of transaminases, percentages of hepatocyte death and expression of P-PERK  
157 and CHOP showed no statistical differences between vehicle and cytokine-treated mice (Expanded  
158 View Fig. 4A-C).

159 To obtain a closer insight into the intrinsic IL-24 function, we genetically depleted IL-24 in AML12  
160 cells by using clustered regularly interspersed short palindromic repeats (CRISPR) / CRISPR  
161 associated protein 9 (Cas9) strategy and treated with Tm to mimic the pathological process *in vivo*. Cell  
162 Counting Kit-8 (CCK8) assays indicated that loss of intrinsic IL-24 impaired cell viability. Reciprocally,  
163 overexpression of IL-24 in AML12 benefited cell survival upon ER stress (Fig. 2F). Furthermore,  
164 annexin-V and propidium iodide staining showed that IL-24 attenuated late phase of apoptosis  
165 (Expanded View Fig. 5A&B). Together, these results suggested that hepatocyte IL-24 plays a  
166 fundamental role in protecting ER stress-mediated cell death.

167 **Hepatocyte IL-24 deficiency activates PERK-eIF2 $\alpha$ -CHOP pathway.**

168 To understand the mechanism behind hepatocyte stress, we assessed CHOP expression in both two  
169 acute liver injury models and Tm-exposed AML12 cells. Remarkably, loss of IL-24 in the mouse liver or  
170 hepatocytes unleashed CHOP expression, while introduction of IL-24 into AML12 efficiently diminished  
171 CHOP level (Fig. 3A&B and Expanded View Fig. 6A&B&C). In line with these findings, IL-24 depletion  
172 upregulated the expression of pro-apoptotic factors such as Bim and TRIB3, and yet downregulated  
173 anti-apoptotic molecule Bcl2 (Expanded View Fig. 6D). To analyze how IL-24 was linked to ER stress,  
174 we further examined the UPR branches in the upstream of CHOP. Unexpectedly, either IRE1 $\alpha$   
175 phosphorylation or ATF6 expression appeared no difference between WT and IL-24 KO mice  
176 (Expanded View Fig. 6E). Noticeably, phosphorylation of PERK was selectively upregulated in the IL-



177 24-deficient mouse liver or AML12 cells, and conversely downregulated upon IL-24 overexpression  
178 (Fig. 3A&B and Expanded View Fig. 6A). Accordingly, we evaluated the downstream molecules of  
179 PERK and found IL-24 deficiency robustly reinforced phosphorylation of eIF2 $\alpha$  and expression of ATF4  
180 and GADD34 in the stressed liver or AML12 cells, while overexpression of IL-24 in AML12 cells inhibited  
181 these molecules (Fig. 3A-E and Expanded View Fig. 6A-C). Immunohistochemical staining further  
182 confirmed higher levels of P-eIF2 $\alpha$  and CHOP in IL-24-deficient liver (Fig. 3C). In aligned with these  
183 results, primary mouse hepatocytes isolated from IL-24-null mice manifested excessive activation of  
184 PERK-CHOP signal upon Tm-induced unresolved ER stress (Fig. 3F). Similarly, we also confirmed the  
185 activation of PERK-CHOP pathway in IL-24-deficient cells under *in vitro* CCL<sub>4</sub> treatment (Expanded  
186 View Fig. 6F).

#### 187 **Hepatocyte IL-24 selectively limits CHOP-mediated death signal.**

188 To explore whether CHOP is indispensable for IL-24 deficiency-related hepatocyte damage, we utilized  
189 siRNA targeting CHOP (siCHOP) to comprehend its executive role in ER-stressed hepatocytes.  
190 Administration of siCHOP to AML12 cells offset the marginal cell death caused by IL-24 depletion (Fig.  
191 4A). In addition, we crossed IL-24-null mice with a CHOP-null strain to generate a double knockout  
192 (DKO) strain. In contrast to IL-24 KO counterparts, both CHOP KO and DKO mice rejected to CCL<sub>4</sub>-  
193 induced liver injury (Fig. 4B). As evident in histological staining, disruption of CHOP eliminated  
194 hepatocyte death in IL-24 KO mice (Fig. 4C). Therefore, these results suggest that IL-24 deficiency  
195 promotes hepatocyte death dependently on CHOP in the context of unresolved ER stress.

196 To better understand the intrahepatic function of IL-24, we treated the IL-24 null mice with IL-24-  
197 expressing adeno-associated viral (AAV) particles 8 weeks prior to CCL<sub>4</sub> administration. As shown in  
198 Fig. 4D&E, re-expression of IL-24 in the liver markedly reduced the levels of serum transferases and

199 P-PERK, P-eIF2 $\alpha$  and CHOP.

200 **Hepatocyte IL-24 attenuates liver damage by restricting the PERK-eIF2 $\alpha$  branch.**

201 To ascertain the importance of PERK-eIF2 $\alpha$  UPR branch, we built on an observation made with the  
202 inhibitor of the integrated stress response (ISRIB), which specifically blocks PERK-eIF2 $\alpha$  signaling but  
203 unaffected ATF6 or inositol-requiring enzyme 1 (IRE1 $\alpha$ ) pathway[24]. Strikingly, pretreating AML12 with  
204 ISRIB compensated the viability loss for the lack of IL-24 but did not change the viability of WT cells  
205 (Fig. 5A). Next, we treated IL-24-null mice with vehicle or ISRIB one hour prior to CCL<sub>4</sub> administration.  
206 As indicated by serum aminotransferases, ISRIB reversed the deterioration of liver damage in IL-24-  
207 null mice but showed no profound impact on WT mice (Fig. 5B). H&E and TUNEL staining visualized  
208 an amelioration in hepatocyte death intensified by IL-24 depletion (Fig. 5C), which could be explained  
209 by the reduction of CHOP expression after ISRIB treatment (Fig. 5D).

210 It is known that the ER protein chaperon GRP78 binds to the cytoplasmic and ER luminal domains of  
211 PERK to prevent its activation[25]. Accordingly, we asked whether hepatocyte IL-24 affected the  
212 interaction between GRP78 and PERK. By performing immunoprecipitation, we pulled down GRP78 in  
213 AML12 cells and detected a significant binding of PERK after 6 h of Tm stimulation. In concert with the  
214 UPR degrees, its association with PERK was significantly enhanced in IL-24-deficient cells and was  
215 weakened in IL-24-overexpressed cells (Fig. 5E and Expanded View Fig. 7A). To obtain a functional  
216 relevance *in vivo*, we replenished chaperon expression in the mouse liver by intravenous injection of  
217 GRP78-expressing AAV. As shown in Fig. 5F and Expanded View Fig. 7B&C, overexpression of GRP78  
218 strongly mitigated liver damage and PERK-CHOP activation in the CCL<sub>4</sub>-treated IL-24-null mice.

219 **Hepatocyte IL-24 predicts prognosis for patients with acute liver injury.**

220 To examine the biological significance of IL-24 in clinical situations, we collected liver tissue and serum

221 samples from 9 healthy donors, 9 patients with liver cirrhosis and 22 patients with acute liver failure  
222 (ALF). Serum IL-24 levels in both two groups of liver injury patients were as low as that in healthy donors  
223 (data not shown), which was aligned with what we found in CCL<sub>4</sub>-induced liver injury mouse models.  
224 Nonetheless, immunohistochemistry, immunoblots and qRT-PCR indicated that IL-24 expression was  
225 reduced in patients with liver cirrhosis and even lower in those with ALF (Fig. 6A-C&F), whereas CHOP  
226 expression was concomitantly escalated in cirrhosis and ALF patients (Fig. 6A&F), suggestive of a  
227 strong correlation between IL-24 expression and hepatocyte stress. In a further analysis of ALF patients,  
228 we obtained the individual liver function test before liver transplant and found IL-24 expression in  
229 hepatocytes was negatively related to serum ALT level as well as liver CHOP expression (Fig. 6D&E).  
230 Taken together, hepatocyte IL-24 may function as a prognosis predictor for patients with acute liver  
231 injury.

## 232 **Discussion**

233 UPR is executed through three ER transmembrane stress sensors: IRE1 $\alpha$ , PERK and activating  
234 transcription factor 6 (ATF6)[5]. Activated IRE1 $\alpha$  splices XBP1 mRNA, which encodes transcription  
235 factor to increase the protein-folding capacity and degrade misfolded proteins. While IRE1 $\alpha$  engages  
236 STAT3 pathway to promote liver regeneration upon liver injury [26], XBP1 switches pro-survival to pro-  
237 apoptotic signal cascades through multiple gene regulation [27, 28]. It has been reported that ATF6  
238 exerts a pro-inflammatory effect on ischemia-reperfusion liver injury [29]. PERK antagonizes UPR by  
239 reducing the flux of protein translocating and phosphorylating eIF2 $\alpha$ , a pervasive translation initiation  
240 factor, which inhibits ribosome assembly and translation. However, eIF2 $\alpha$  selectively upregulates the  
241 transcription factor ATF4 and its downstream target CHOP. Sustained ER stress engages CHOP to  
242 enhance UPR and inflammation signaling and lead to apoptosis [22, 30]. The mouse models in our

243 study manifested activation of three UPR sensors and CHOP. The latter was also found to be  
244 upregulated in human cirrhosis and ALF patients. Given the recovery of liver function in most cases,  
245 we hypothesized an unknown machinery restoring hepatocyte ER homeostasis.

246 IL-24 has been reported to cause ER stress-mediated apoptosis through a secretion-independent  
247 manner [19]. Unexpectedly, we detected abundant IL-24 expression in the mouse or human liver under  
248 normal condition. In the CCL<sub>4</sub> model, hepatocyte IL-24 increases instantaneously and then returns to  
249 baseline as the liver function recovers. Nonetheless, serum IL-24 was undetectable in CCL<sub>4</sub>-treated  
250 mice and human cirrhosis and ALF patients, excluding its engagement as a “hepatokine” in UPR  
251 condition. Importantly, targeting ER stress-related transcription factors (ATF4, ATF6, XBP1 and CHOP)  
252 significantly reduced the mRNA level of hepatocyte IL-24. However, only silencing of XBP1 deprived  
253 IL-24 expression under either normal or deleterious circumstance. This reflects a physiological function  
254 of hepatic XBP1 and also raises a possibility that intrinsic IL-24 may regulate stress signals.

255 Since adenovirus-mediated overexpression causes protein synthesis overload and induces potential  
256 UPR, we employed gene knockout mice to improve our understanding of cytosolic IL-24 in ER stress  
257 and liver damage. Remarkably, we found IL-24-null mice were more sensitive to CCL<sub>4</sub>-induced liver  
258 injury than WT counterparts. While either ATF6 expression or IRE1 $\alpha$  phosphorylation was unaffected,  
259 P-PERK, P-eIF2 $\alpha$ , CHOP and GADD34 exhibited excessive expression in the IL-24-deficient mouse  
260 liver. In addition, our results showed elevated levels of Bim and TRIB3 and a reduced level of Bcl2 in  
261 IL-24-null mice, which might be a consequence of CHOP activation [3, 11]. Effects of hepatocyte IL-24  
262 on PERK-eIF2 $\alpha$ -CHOP branch and cell death were corroborated by depleting or introducing IL-24 in  
263 AML12 cells. Furthermore, knocking out CHOP in IL-24-null mice or knocking down CHOP in IL-24-null  
264 AML12 protected ER stress-associated hepatocyte damage. It has been reported that eIF2 $\alpha$

265 phosphorylation acts as a central event sensitizing stressed cells to death [12, 27, 29]. Accordingly, we  
266 found that the extensive liver damage in IL-24-null mice could be alleviated by administration of ISRIB,  
267 which selectively reverses the effects of eIF2 $\alpha$  phosphorylation [24]. Clinically, we observed a  
268 concomitant downregulation of IL-24 and upregulation of CHOP in the cirrhosis and ALF tissues as  
269 compared with the healthy liver. Taken together, these findings demonstrated the protective role of IL-  
270 24 in resolving hepatocyte ER stress is implemented by perturbation of PERK-eIF2 $\alpha$ -CHOP pathway.

271 As one of the most important ER chaperons, GRP78 is essential in conjunction with misfolded  
272 proteins and is important for maintaining ER homeostasis [8, 31]. Given the reinforced ER stress in IL-  
273 24-null hepatocytes, GRP78 conserved its affinity to combine and sequester overreacted PERK.  
274 Despite this, redundant PERK phosphorylated itself and triggered the downstream signaling. Previous  
275 study indicated that *in vivo* overexpression of GRP78 using an adenovirus vector could attenuate ER  
276 stress-associated liver steatosis [32]. In this study, introduction of GRP78 in the IL-24-deficient mouse  
277 liver by AAV infection attenuated PERK-facilitated hepatocyte stress. This may provide a potential  
278 therapeutic opportunity for UPR-related human liver diseases, especially those with low hepatocyte IL-  
279 24 expression.

280 To our knowledge, a variety of cytokines, including those expressed or secreted by hepatocytes,  
281 evoke inflammatory responses and promote cell death in liver diseases. In a diet-induced  
282 steatohepatitis mouse model, hepatocyte IL-1 $\alpha$  was found to be upregulated in response to ER stress,  
283 which in turn enhanced CHOP expression; IL-1 $\alpha$  released from necrotic hepatocytes accelerates  
284 steatohepatitis via induction of inflammatory cytokines [33, 34]. In lipopolysaccharide (LPS)-induced  
285 liver injury, hepatocyte-derived IL-7 augmented CD8<sup>+</sup> T cell cytotoxic activity and promoted the  
286 development of autoimmune diseases [35]. In the present study, we showed that intracellular IL-24

287 uniquely benefited hepatocyte ER homeostasis, exerting an anti-inflammatory effect. However, it has  
288 not been defined whether hepatocyte can secrete IL-24 under pathological conditions and how it affects  
289 hepatocytes or immune cell populations in an autocrine or paracrine fashion.

290 Conclusively, we uncovered that cytosolic IL-24 is critical for protecting ER stressed-hepatocytes  
291 from death, which may be a good diagnostic and therapeutic target for clinical liver diseases.

## 292 **Materials and Methods**

293 **Patients.** Cirrhosis and liver failure tissues were collected from liver transplant recipients treated in  
294 Department of Liver Surgery, Renji Hospital, School of Medicine, Shanghai Jiaotong University. Normal  
295 liver tissues were collected from the healthy transplant donors through liver biopsy. All samples were  
296 collected with informed consent, and the experiments were approved by the ethical review committee  
297 of the World Health Organization Collaborating Center for Research in Human Production (authorized  
298 by the Shanghai Municipal Government).

299 **Mice.** All mice used in this study were in C57BL/6J background. IL-24 knockout (KO) mice were  
300 generated in ShanghaiTech University. The targeted Embryonic stem (ES) cells were ordered from The  
301 Knockout Mouse Project (KOMP) Repository, in which the insertion of Velocigene cassette ZEN-Ub1  
302 created a deletion of size 3306 bp between positions 132779010-132782315 of Chromosome 1  
303 (Genome Build37). These ES cells were injected into albino C57BL/6J blastocysts and the following  
304 inbred strain was generated by backcrossing breeding. The following PCR primers were used to identify  
305 WT (571 bp) and KO (338 bp) alleles: 5'- GTACCCACTCCAATGCATACATT -3', 5'-  
306 GCTCATCCAGGATGAAGCTACAC -3', and 5'-GAAACCAGGCAAATCTCCACTCC -3'. The CHOP KO  
307 mice and Alb<sup>Cre</sup> transgenic mice were purchased from Jackson Laboratories. We crossed the CHOP  
308 KO and IL-24 KO strains to produce the double knockout (DKO) strain. The Xbp1<sup>F/F</sup> strain, a gift from

309 Dana Farber Cancer Institute, USA, was previously described [36]. Mice devoid of XBP1 selectively in  
310 hepatocytes were generated by breeding the *Xbp1<sup>FF</sup>* mice with *Alb<sup>Cre</sup>* strain. For acute liver injury model,  
311 CCL<sub>4</sub> dissolved in olive oil was injected intraperitoneally into 8-week-old female mice at a dose of 2  
312 ml/kg [26]. Besides, mice were fasted overnight and administered 500 mg/kg APAP (Sigma) by oral  
313 gavage [12]. In some settings, mice were intraperitoneally injected with 0.25 mg/kg ISRIB (Selleck) or  
314 recombinant IL-24 (R&D) at a dose of 5 µg per mouse one hour prior to CCL<sub>4</sub> administration. All mice  
315 were maintained under specific pathogen-free (SPF) conditions, on a 12 h light-dark cycle. All mouse  
316 experiments were approved by the Shanghai Administrative Committee for Laboratory Animals.

317 **Isolation of primary mouse hepatocytes and cell cultures.** The mouse liver was perfused with an  
318 EGTA-buffer (37°C) at a constant flow of 5 ml/min for 8 minutes via the hepatic portal vein. Next, a  
319 secondary perfusion with a solution of collagenase I (Sigma-Aldrich) for 10 minutes (2 ml/min) is  
320 required for a completely digestion. The liver was disrupted gently to release hepatocytes into a  
321 suspension buffer. Subsequently, the liver capsule was filtered through a 70-µm cell strainer and the  
322 primary hepatocytes were collected after three cycles of centrifugations at 400 rpm for 5 min at 4°C. A  
323 suspension of 1×10<sup>6</sup> cells/mL was successively seeded in culture plates. Murine hepatocyte cell line  
324 AML12 was from The First Affiliated Hospital of Nanjing Medical University. Primary hepatocytes and  
325 AML12 cells were cultured in William's E Medium (Gibco) supplemented with 1X insulin-transferrin-  
326 selenium supplement (Gibco), 1X sodium pyruvate (Gibco), 40 ng/ml dexamethasone (Sigma-Aldrich)  
327 and 10% FBS (Gibco), incubated at 37 °C and 5% CO<sub>2</sub>, and were tested for mycoplasma contamination  
328 once every three months. In some settings, cells were treated with 5 µg/ml Tm (Sangon Biotech) or 200  
329 nM ISRIB (Selleck).

330 **siRNA, sgRNA and gene transfection.** The siRNAs were transiently transfected into AML12 cells by

331 using Lipofectamine RNAiMAX (Invitrogen) following manufacturer's instructions. A non-target siRNA  
332 was used as negative control. The siRNA sequences are listed as below: mouse XBP1,  
333 CCAAGCUGGAAGCCAUAATT; mouse CHOP, CCAGAUUCCAGUCAGAGUUTT; mouse ATF4,  
334 CUCCCAGAAAGUUUAAUAATT; mouse ATF6, GCAGUCGAUUAUCAGCAUATT. Stable knockout of  
335 IL24 in AML12 cells was generated by lentiviral-based delivery of sgRNA/cas9 components. Briefly,  
336 sgRNA targeting the exonic region of murine *Il24* gene (5'-GAAGGATTAGGCTCAGGCAG-3') were  
337 subcloned into the lentiviral vector GV393 (U6-sgRNA-EF1a-Cas9-FLAG-P2A-EGFP) (Genechem,  
338 China), while a non-target sgRNA (5'-CGCTTCCGCGGCCCGTTCAA-3') was used as a negative  
339 control. IL-24-overexpression construct was generated by subcloning PCR-amplified full-length cDNA  
340 (NM\_053095) into a GV358 (Ubi-MCS-Flag-SV40-EGFP-IRES-puromycin) lentiviral vector (Shanghai  
341 Genechem). An empty vector was used as a negative control. Viral particles were packaged in 293T  
342 cell and used to infect AML12 cells in the presence of 8 µg/ml polybrene followed by puromycin selection.

343 **Recombinant AAV construction and In vivo transduction.** GRP78-overexpression construct was  
344 generated by subcloning PCR-amplified full-length *Il24* (NM\_053095) or *Hspa5* (NM\_022310) cDNA  
345 into a GV461 (CMV-betaGlobin-MCS-SV40 PolyA) AAV vector (Shanghai Genechem). An empty vector  
346 was used as a negative control. IL24 KO mice of 5 weeks were intravenously injected with  $2 \times 10^{11}$   
347 vector-genome (vg) AAV 8 weeks prior to CCL<sub>4</sub> administration.

348 **Immunohistochemistry and Immunofluorescence.** Immunohistochemistry for target molecules was  
349 performed on serial sections from human or mouse liver tissues. Sections were deparaffinized,  
350 subjected to antigen retrieval, and incubated with primary antibodies against IL-24 (Abcam, ab115207),  
351 P-eIF2a (Huabio, ET1603-14) and CHOP (Huabio, ET1703-05). All responses were followed by staining  
352 with the corresponding HRP-conjugated secondary antibody (Jackson Immuno Research Laboratories).



353 The stained slides were assessed with integrated optical density (IOD) using ImageJ software. The  
354 apoptotic cells were defined by using In Situ Cell Death Detection Kit (Roche) following manufacturer's  
355 protocol and quantified by calculating positively stained cells in at least five randomly chosen HPFs of  
356 each slide.

357 **Immunoprecipitation.** Cell samples were collected and lysed in IP lysis buffer (Thermo Fisher)  
358 containing protease inhibitor cocktail (Merck Millipore) for 30 minutes. After an insoluble product-clear  
359 step by full speed centrifuge, the supernatant was harvest and incubated with anti-GRP78 (Abcam,  
360 ab21685) antibody and protein A beads (Thermo Fisher) at 4 °C overnight. The beads were collected  
361 and washed extensively, and the immuno-complex was eluted with western blot loading buffer.

362 **Western blot.** Cell or tissue lysates were separated on 6-8% polyacrylamide-SDS gels and transferred  
363 to a nitrocellulose membrane using transfer buffer (25 mM Tris, 192 mM glycine and 10% methanol).  
364 The blots were blocked with 5% non-fat milk in PBS containing 0.05% Tween-20 for 1 h and then probed  
365 overnight at 4°C in PBST with primary antibodies. Next, the blots were incubated with a secondary  
366 antibody conjugated to horseradish peroxidase (HRP) (1:5,000, Jackson Immuno Research  
367 Laboratories) and detected with a ChemiDoc XRS system (Bio-Rad). Primary antibodies used in  
368 western blot are listed below: anti-Flag (14793S), anti-P-PERK (3179S), anti-ATF4 (11815S) and anti-  
369 CHOP (2895S) were from Cell Signal Technology, anti-human IL-24 (ab115207), anti-P-eIF2a  
370 (ab32157) and anti-GRP78 (ab21685) were from Abcam, anti-mouse IL-24 (MAB2786) was from R&D  
371 Systems, anti-PERK (sc-377400) was from Santa Cruz.

372 **Quantitative PCR (qPCR).** Total RNA samples used for RT-qPCR were isolated by using an RNeasy  
373 kit (BioTeke) with an additional on-column DNase-I digestion step. Total RNA or purified mRNA was  
374 reverse transcribed with PrimeScript™ RT Master Mix (Takara) using Oligo dT primers to obtain

375 complementary DNA. qPCR was carried out by using SYBR Premix Ex Taq II (Takara).  $\beta$ -actin was  
376 used as an internal control. The primers used in this study are: mouse GRP78(F:5'-  
377 TCATCGGACGCACTTGGAA -3';R:5'- CAACCACCTTGAATGGCAAGA -3'); mouse CHOP(F:5'-  
378 CTGGAAGCCTGGTATGAGGAT-3';R:5'- CAGGGTCAAGAGTAGTGAAGGT -3') ; mouse ATF4(F:5' -  
379 CTCTTGACCACGTTGGATGAC - 3'; R: 5' - CAACTTCACTGCCTAGCTCTAAA -3') ; mouse IL-24  
380 (F:5'- GAGCCTGCCCAACTTTTTGTG -3';R:5'- TGTAGTCCCCAACTCATCTGTG -3'); mouse sXBP1  
381 (F: 5'- CTGAGTCCGAATCAGGTGCAG -3'; R: 5'- GTCCATGGGAAGATGTTCTGG - 3'); mouse ATF6  
382 (F: 5'- TGCCTTTTAGTCCGGTTCTT -3'; R: 5'- GGCTCCATAGGTCTGACTCC - 3'); mouse GADD34  
383 (F: 5'- GAGGGACGCCCACTTC -3'; R: 5'- TTACCAGAGACAGGGGTAGGT - 3'); mouse IL6 (F:  
384 5'- TAGTCCTTCTACCCCAATTTCC -3'; R: 5'- TTGGTCCTTAGCCACTCCTTC - 3'); mouse IL1A (F:  
385 5'- CGAAGACTACAGTTCTGCCATT -3'; R: 5'- GACGTTTCAGAGGTTCTCAGAG - 3'); mouse Bim (F:  
386 5'- GACAGAACCGCAAGGTAATCC -3'; R: 5'- ACTTGTCACTCATGGGTG - 3'); mouse TRIB3 (F:  
387 5'- GCAAAGCGGCTGATGTCTG -3'; R: 5'-AGAGTCGTGGAATGGGTATCTG - 3'); mouse Bcl2 (F: 5'-  
388 ATGCCTTTGTGGAATATATGGC -3'; R: 5'- GGTATGCACCCAGAGTGATGC - 3'); mouse TNFA (F:  
389 5'- CTCTTCTGTCTACTGAACTTC -3'; R: 5'- CTCCTGGTATGAGATAGCAA - 3'); mouse  $\beta$ -actin (F:5'-  
390 ACCCACACTGTGCCATCTAC -3';R:5'- AGCCAAGTCCAGACGCAGG -3'); human IL-24(F:5'-  
391 CACACAGGCGGTTTCTGCTAT-3'; R:5'- TCCAAGTGGTGAATGCTCTCC -3'); human  $\beta$ -actin (F: 5'-  
392 GGGAAATCGTGCCTGACATTAAG -3'; R: 5'- TGTGTTGGCGTACAGGTCTTTG - 3').

393 **Dual luciferase assay.** A DNA fragment of *IL24* (-1036 ~ -598 bp in the upstream of transcription start  
394 site) was subcloned into a luciferase reporter vector pGL4 (Promega). AML12 cells were cultured in 24-  
395 well plates for 24 hours, then transfected with siRNAs. The cells were co-transfected with luciferase  
396 reporter plasmid and renilla luciferase plasmid (an internal control) at a ratio of 10:1. Twenty-four hours

397 later, cells were treated with Tm (5 µg/ml). Cells from each independent well were harvested and  
398 detected by Dual-Luciferase Reporter Assay System (Promega) at indicated time. Get the relative light  
399 unit (RLU) by normalizing to renilla luminescence activities.

400 **Apoptosis analysis.** AML12 cells were stimulated by Tm, and  $1\sim 5 \times 10^5$  cells were collected by  
401 centrifugation. The cells were resuspended with the 1x Binding Buffer and incubated with 5µL FITC-  
402 conjugated annexin V Annexin FITC (BD Biosciences, USA) and 5µL PI (BD Biosciences, USA) to each  
403 tube according to the experimental protocol. Then samples were analyzed by fluorescence-activated  
404 cell sorter (FACS).

405 **Statistical analysis** At least three biological replicates were used in each experiment unless otherwise  
406 stated. Data were analyzed with GrapPad Prism 7 and were presented as the mean ± standard error  
407 of the mean (SEM). Two-tailed Student's t-tests were performed to assess the statistical significance of  
408 differences between groups. Pearson correlation coefficients (*r*) were calculated to assess correlation  
409 and statistical significance was assessed by a two-tailed t-test of  $r = 0$ .

410 **Expanded View** for this article is available online

#### 411 **Acknowledgements**

412 We thank all patients and donors for participating in this study. We thank Ms Jiaxin Li (Renji Hospital,  
413 Shanghai, China) for helping with clinical sample collection, Dr. Indrajit Das (QIMR Berghofer Medical  
414 Institute, QLD, Australia) for the advice on ER stress antagonism, and Dr. Laurie H. Glimcher (Dana-  
415 Farber Cancer Institute, MA, USA) for providing Xbp1<sup>F/F</sup> mice as a kind gift. This study was supported  
416 by National Natural Science Foundation of China (81672801 to JH, 81670598 to QX and 81700498 to  
417 Haiyan Z), Chen Guang Project in Shanghai Municipal Education Commission and Shanghai Education  
418 Development Foundation (15CG13 to JH and 17CG20 to Haiyan Z) and National Key Research and

419 Development Program of China (2016YFC0905901 to XH).

#### 420 **Author contributions**

421 J.H., X.H. and Q.X. conceived and designed the project, analysed and interpreted results, obtained  
422 funding and wrote the manuscript; J.W. and B.H. designed and performed experiments, analysed and  
423 interpreted results and wrote the manuscript; He Zhang, Zhenjun Zhao, Zhicong Zhao contributed to  
424 design and conduction of experiments and to analysis and interpretation of data; Haiyan Zhang, XM,  
425 Bin Shen and Beicheng Sun contributed to conception of research.

426 **Conflict of interest:** The authors declare no conflict of interest.

#### 427 **References**

- 428 1. Schwabe RF, Luedde T (2018) Apoptosis and necroptosis in the liver: a matter of life and death. *Nat Rev*  
429 *Gastroenterol Hepatol*
- 430 2. Dara L, Ji C, Kaplowitz N (2011) The contribution of endoplasmic reticulum stress to liver diseases.  
431 *Hepatology* **53**: 1752-63
- 432 3. Malhi H, Kaufman RJ (2011) Endoplasmic reticulum stress in liver disease. *J Hepatol* **54**: 795-809
- 433 4. Hiramatsu N, Chiang W-C, Kurt TD, Sigurdson CJ, Lin JH (2015) Multiple Mechanisms of Unfolded Protein  
434 Response-Induced Cell Death. *Am J Pathol* **185**: 1800-8
- 435 5. Walter P, Ron D (2011) The unfolded protein response: from stress pathway to homeostatic regulation.  
436 *Science* **334**: 1081-6
- 437 6. He C, Qiu Y, Han P, Chen Y, Zhang L, Yuan Q, Zhang T, Cheng T, Yuan L, Huang C, *et al.* (2018) ER stress  
438 regulating protein phosphatase 2A-B56gamma, targeted by hepatitis B virus X protein, induces cell cycle arrest  
439 and apoptosis of hepatocytes. *Cell Death Dis* **9**: 762
- 440 7. Lebeaupin C, Vallee D, Hazari Y, Hetz C, Chevet E, Bailly-Maitre B (2018) Endoplasmic reticulum stress  
441 signalling and the pathogenesis of non-alcoholic fatty liver disease. *J Hepatol* **69**: 927-947
- 442 8. Mccullough KD, Martindale JI, klotz L-o, aw T-y, Holbrook NJ (2001) Gadd153 sensitizes cells to  
443 endoplasmic reticulum stress by down-regulating Bcl2 and perturbing the cellular redox state. *Mol Cell Biol* **21**:  
444 1249-59
- 445 9. Chen BPC, Wolfgang CD, Hai T (1996) Analysis of ATF3, a transcription factor induced by physiological  
446 stresses and modulated by gadd153. *Mol Cell Biol* **16**: 1157-1168
- 447 10. Sylvester SL, Rhys CMJa, Luethy-Martindale JD, Holbrook NJ (1994) Induction of GADD153, a  
448 CCAAT/enhancer-binding protein (C/EBP)-related gene, during the acute phase response in rats. *J Biol Chem*  
449 **269**: 20119-20125
- 450 11. Puthalakath H, O'Reilly LA, Gunn P, Lee L, Kelly PN, Huntington ND, Peter D. Hughes, Michalak EM,  
451 McKimm-Breschkin J, Motoyama N, *et al.* (2007) ER stress triggers apoptosis by activating BH3-only protein  
452 Bim. *Cell* **129**: 1337-49
- 453 12. Uzi D, Barda L, Scaiewicz V, Mills M, Mueller T, Gonzalez-Rodriguez A, Valverde AM, Iwawaki T, Nahmias Y,

- 454 Xavier R, *et al.* (2013) CHOP is a critical regulator of acetaminophen-induced hepatotoxicity. *J Hepatol* **59**: 495-  
455 503
- 456 13. Jiang H, Lin J, Su Z-Z, Goldstein NI, Fisher PB (1995) Subtraction hybridization identifies a novel melanoma  
457 differentiation associated gene, mda7, modulated during human melanoma differentiation, growth and  
458 progression. *Oncogene* **11**: 2477-2486
- 459 14. Jiang H, Su Z-Z, Lin J, Young CSH, Goldstein NI, Fisher PB (1996) The melanoma differentiation-associated  
460 gene mda-7 suppresses cancer cell growth. *Proc Natl Acad Sci USA* **93**: 9160-9165
- 461 15. Saeki T, Mhashilkar A, Swanson X, Zou-Yang XH, Sieger K, Kawabe S, Branch CD, Zumstein L, Meyn RE, Roth  
462 JA, *et al.* (2002) Inhibition of human lung cancer growth following adenovirus-mediated mda-7 gene expression  
463 in vivo. *Oncogene* **21**: 4558-66
- 464 16. Su Z-Z, Madireddi MT, Lin J, Young CSH, Kitada S, Reed JC, Goldstein NI, Fisher PB (1998) The cancer  
465 growth suppressor gene mda-7 selectively induces apoptosis in human breast cancer cells and inhibits tumor  
466 growth in nude mice. *Proc Natl Acad Sci USA* **95**: 14400-14405
- 467 17. Chada S, Sutton RB, Ekmekcioglu S, Ellerhorst J, Mumm JB, Leitner WW, Yang H-Y, Sahin AA, Hunt KK,  
468 Fuson KL, *et al.* (2004) MDA-7/IL-24 is a unique cytokine-tumor suppressor in the IL-10 family. *Int*  
469 *Immunopharmacol* **4**: 649-67
- 470 18. Sarkar D, Su Z-Z, Lebedeva IV, Sauane M, Gopalkrishnan RV, Valerie K, Dent P, Fisher PB (2002) MDA-7/(IL-  
471 24) Mediates selective apoptosis in human melanoma cells by inducing the coordinated overexpression of the  
472 GADD family of genes by means of p38 MAPK. *Proc Natl Acad Sci USA* **99**: 10054-10059
- 473 19. Gupta P, Walter MR, Su Z-Z, Lebedeva IV, Emdad L, Randolph A, Valerie K, DevanandSarkar, Fisher PB  
474 (2006) BiP/GRP78 is an intracellular target for MDA-7/IL-24 induction of cancer-specific apoptosis. *Cancer Res*  
475 **66**: 8182-91
- 476 20. Hasnain SZ, Borg DJ, Harcourt BE, Tong H, Sheng YH, Ng CP, Das I, Wang R, Chen AC-H, Loudovaris T, *et al.*  
477 (2014) Glycemic control in diabetes is restored by therapeutic manipulation of cytokines that regulate beta cell  
478 stress. *Nat Med* **20**: 1417-26
- 479 21. Yamamoto K, Yoshida H, Kokame K, Kaufman RJ, Mori K (2004) Differential contributions of ATF6 and XBP1  
480 to the activation of endoplasmic reticulum stress-responsive cis-acting elements ERSE, UPRE and ERSE-II. *J*  
481 *Biochem* **136**: 343-50
- 482 22. Hong F, Liu B, Wu BX, Morreall J, Roth B, Davies C, Sun S, Diehl JA, Li Z (2017) CNPY2 is a key initiator of the  
483 PERK-CHOP pathway of the unfolded protein response. *Nat Struct Mol Biol* **24**: 834-839
- 484 23. Larson AM, Polson J, Fontana RJ, Davern TJ, Lalani E, Hynan LS, Reisch JS, Schiødt FV, Ostapowicz G, Shakil  
485 AO, *et al.* (2005) Acetaminophen-induced acute liver failure: results of a United States multicenter, prospective  
486 study. *Hepatology* **42**: 1364-72
- 487 24. Sidrauski C, Acosta-Alvear D, Khoutorsky A, Vedantham P, Gallagher, Hann B, Nader K, Walter P, Ang KK-H,  
488 Wilson C, *et al.* (2013) Pharmacological brake-release of mRNA translation enhances cognitive memory. *eLife* **2**:  
489 e00498
- 490 25. Wang M, Kaufman RJ (2014) The impact of the endoplasmic reticulum protein-folding environment on  
491 cancer development. *Nat Rev Cancer* **14**: 581-97
- 492 26. Liu Y, Shao M, Wu Y, Yan C, Jiang S, Liu J, Dai J, Yang L, Li J, Jia W, *et al.* (2015) Role for the endoplasmic  
493 reticulum stress sensor IRE1alpha in liver regenerative responses. *J Hepatol* **62**: 590-8
- 494 27. Han CY, Lim SW, Koo JH, Won Kim, Kim SG (2016) PHLDA3 overexpression in hepatocytes by endoplasmic  
495 reticulum stress via IRE1-Xbp1s pathway expedites liver injury. *Gut* **65**: 1377-88
- 496 28. Fink EE, Moparthy S, Bagati A, Bianchi-Smiraglia A, Lipchick BC, Wolff DW, Roll MV, Wang J, Liu S, Bakin AV,  
497 *et al.* (2018) XBP1-KLF9 Axis Acts as a Molecular Rheostat to Control the Transition from Adaptive to Cytotoxic

498 Unfolded Protein Response. *Cell Rep* **25**: 212-223 e4  
499 29. Rao J, Yue S, Fu Y, Zhu J, Wang X, Busuttill RW, Kupiec-Weglinski JW, Lu L, Zhai Y (2014) ATF6 mediates a  
500 pro-inflammatory synergy between ER stress and TLR activation in the pathogenesis of liver ischemia-  
501 reperfusion injury. *Am J Transplant* **14**: 1552-61  
502 30. Hotamisligil GkS (2010) Endoplasmic reticulum stress and the inflammatory basis of metabolic disease.  
503 *Cell* **140**: 900-17  
504 31. Dent P, Yacoub A, Hamed HA, Park MA, Dash R, Bhutia SK, Sarkar D, Wang X-Y, Gupta P, Emdad L, *et al.*  
505 (2010) The development of MDA-7/IL-24 as a cancer therapeutic. *Pharmacol Ther* **128**: 375-84  
506 32. Nakagawa H, Umemura A, Taniguchi K, Font-Burgada J, Dhar D, Ogata H, Zhong Z, Valasek MA, Seki E,  
507 Hidalgo J, *et al.* (2014) ER stress cooperates with hypernutrition to trigger TNF-dependent spontaneous HCC  
508 development. *Cancer Cell* **26**: 331-343  
509 33. Werman A, Werman-Venkert R, White R, Lee J-K, Werman B, Krelin Y, Voronov E, Dinarello CA, Apte RN  
510 (2004) The precursor form of IL-1 $\alpha$  is an intracrine proinflammatory activator of transcription. *Proc Natl Acad*  
511 *Sci USA* **101**: 2434–2439  
512 34. Kandel-Kfir M, Almog T, Shaish A, Shlomai G, Anafi L, Avivi C, Barshack I, Grosskopf I, Harats D, Anafi YK  
513 (2015) Interleukin-1 $\alpha$  deficiency attenuates endoplasmic reticulum stress-induced liver damage and CHOP  
514 expression in mice. *J Hepatol* **63**: 926-33  
515 35. Sawa Y, Arima Y, Ogura H, Kitabayashi C, Jing-Jing Jiang, Fukushima T, Kamimura D, Hirano T, Murakami M  
516 (2009) Hepatic interleukin-7 expression regulates T cell responses. *Immunity* **30**: 447-57  
517 36. Song M, Sandoval TA, Chae CS, Chopra S, Tan C, Rutkowski MR, Raundhal M, Chaurio RA, Payne KK, Konrad  
518 C, *et al.* (2018) IRE1 $\alpha$ -XBP1 controls T cell function in ovarian cancer by regulating mitochondrial activity.  
519 *Nature* **562**: 423-428  
520  
521  
522  
523  
524  
525  
526  
527  
528  
529  
530  
531  
532

533 **Figure legends**

534 **Fig. 1 IL-24 expression in the ER stressed-mouse liver and hepatocytes.** (A, B) WT mice were  
535 intraperitoneally injected with a single dose of CCL<sub>4</sub> (2ml/kg). (A) GRP78, IL-24 and CHOP protein  
536 levels in the liver tissues were evaluated by western blot at indicated time points. Results are normalized  
537 to  $\beta$ -actin.  $n = 3$  independent experiments. (B) IL-24 and CHOP mRNA levels in the liver tissues were  
538 assessed by qRT-PCR at indicated time points. Results are normalized to  $\beta$ -actin.  $n = 3$  biological  
539 replicates. (C, D) AML12 cells were exposed to Tm (5  $\mu$ g/ml) for the indicated time period. IL-24 and  
540 CHOP levels were evaluated by western blot (C) and qRT-PCR (D) at indicated time points.  $n = 2$   
541 independent experiments (C) or 3 biological replicates (D). (E) AML12 cells were transfected with  
542 indicated siRNAs or negative control (NC) 24 h prior to Tm treatment. IL-24 protein levels at indicated  
543 time points were assessed by western blot.  $n = 3$  independent experiments. (F) *IL24* promoter activity in  
544 AML12 cells expressing indicated siRNAs, as quantified using luciferase assay. *Renilla* luciferase  
545 activity was normalized to firefly activity and presented as relative luciferase activity.  $n = 3$  biological  
546 replicates. Data are presented as means  $\pm$  SEM. \* $P < 0.05$ , \*\* $P < 0.01$ , \*\*\* $P < 0.001$ , \*\*\*\* $P < 0.0001$ .  
547  $P$ -values were determined by two tailed  $t$ -test.

548 **Fig. 2 The protective role of hepatocyte IL-24 in ER stress-induced cell death.** Sex- and age-  
549 matched WT and IL-24-null mice were intraperitoneally injected with vehicle or CCL<sub>4</sub>. (A) Mouse liver  
550 function was assessed by measuring serum ALT (left) and AST (right) levels.  $n = 5-8$ . (B) Mouse survival  
551 rate after CCL<sub>4</sub>-treatment was determined via Log-rank (Mantel-Cox) analysis.  $n = 11-13$ . (C, D) H&E  
552 (C) and TUNEL (D) staining of the liver tissues from vehicle or CCL<sub>4</sub>-treated mice.  $n = 5-8$  mice. Scale  
553 bar, 100  $\mu$ m. (E) Hepatocyte apoptosis after CCL<sub>4</sub>-treatment was assessed by counting TUNEL positive  
554 cells.  $n = 5-8$  mice. (F) AML12 cells were transfected with lentiviral vectors expressing IL-24-targeted

555 sgRNA (left, referred to as IL-24 KO) or IL-24 cDNA (right, referred to as IL-24 OE). An empty vector  
556 was transfected as a negative control, respectively. Cell viability of indicated AML12 cells after Tm  
557 stimulation was assessed by CCK8 assay.  $n = 3$  biological replicates. Data are presented as means  $\pm$   
558 SEM.  $*P < 0.05$ ,  $**P < 0.01$ ,  $***P < 0.001$ .  $P$ -values were determined by two tailed  $t$ -test.

559 **Fig. 3 IL-24 deficiency facilitates PERK-eIF2 $\alpha$ -CHOP UPR in hepatocyte.** (A, B) P-PERK, P-eIF2 $\alpha$ ,  
560 CHOP and GRP78 protein levels in CCL<sub>4</sub>-treated WT and IL-24 KO mice (A) and Tm-stimulated control  
561 and IL-24 KO AML12 cells (B), as evaluated by western blot at indicated time points.  $n = 3$  independent  
562 experiments. (C) Immunohistological staining of P-eIF2 $\alpha$  and CHOP in the liver tissues from CCL<sub>4</sub>-  
563 treated WT and IL-24 KO mice.  $n = 5-8$  mice. Scale bar, 100  $\mu$ m. Results were represented in median  
564 integrated optical density (IOD) value. (D) GADD34, ATF4 and CHOP mRNA levels in the liver tissues  
565 from vehicle or CCL<sub>4</sub>-treated mice.  $n = 4-7$  mice. (E) ATF4 and CHOP mRNA levels in indicated AML12  
566 cells after Tm stimulation as assessed by qRT-PCR at indicated time points. (F) P-PERK and CHOP  
567 protein levels in Tm-stimulated primary hepatocytes from WT and IL-24 KO mouse, as evaluated by  
568 western blot.  $n = 3$  independent experiments. Data are presented as means  $\pm$  SEM.  $*P < 0.05$ ,  $**P <$   
569  $0.01$ ,  $***P < 0.001$ ,  $****P < 0.0001$ .  $P$ -values were determined by two tailed  $t$ -test.

570 **Fig. 4 Hepatocyte IL-24 protects CHOP-executed cell death.** (A) AML12 cells were treated with  
571 siCHOP or negative control (NC). Cell viability of indicated AML12 cells after Tm stimulation was  
572 assessed by CCK8 assay.  $n = 3$  biological replicates. (B) Serum ALT (upper) and AST (lower) levels in  
573 WT, IL-24 KO, CHOP KO and IL-24/CHOP double KO (DKO) mice treated with CCL<sub>4</sub> for 24 h.  $n = 5-8$   
574 mice. (C) TUNEL staining (left) of the liver tissues from CCL<sub>4</sub>-treated mice and quantification of TUNEL  
575 positive cells (right). Scale bar, 100  $\mu$ m. (D) IL-24 KO mice were intravenously injected with AAV  
576 particles expressing an empty vector or mouse IL-24 8 weeks prior to CCL<sub>4</sub> administration. Liver injury



577 was assessed by serum ALT and AST levels.  $n = 4$  mice. (E) IL-24, P-PERK, P-eIF2 $\alpha$ , CHOP and  
578 GRP78 protein levels in the liver tissues from CCL<sub>4</sub>-exposed IL-24 KO mice with or without IL-24 re-  
579 expression.  $n = 3$  independent experiments. Data are presented as means  $\pm$  SEM. \* $P < 0.05$ , \*\* $P <$   
580 0.01, \*\*\* $P < 0.001$ , \*\*\*\* $P < 0.0001$ .  $P$ -values were determined by two tailed  $t$ -test.

581 **Fig. 5 Perturbation of PERK-eIF2 $\alpha$  signaling compensates ER homeostasis upon IL-24 loss.** (A)

582 Indicated AML12 cells were pre-treated with 200 nM ISRIB or DMSO (Vehicle) 24 h prior to Tm  
583 exposure. Cell viability of indicated AML12 cells after Tm stimulation was assessed by CCK8 assay.  $n$   
584 = 3 biological replicates. (B, C) WT and IL-24 KO mice were intraperitoneally injected with vehicle or  
585 ISRIB (0.25 mg/kg) 60 min prior to CCL<sub>4</sub> administration. Liver injury was assessed by serum ALT and  
586 AST levels (B) and TUNEL positive cell ratios (C).  $n = 5$  mice. Scale bar, 100  $\mu$ m. (D) Immunoblotting  
587 of CHOP in the liver tissues from CCL<sub>4</sub>-exposed mice with or without ISRIB treatment.  $n = 3$  independent  
588 experiments. (E) Immunoblotting of PERK in the precipitates obtained by immunoprecipitation of  
589 endogenous GRP78 in indicated AML12 cells.  $n = 3$  independent experiments. (F) IL-24 KO mice were  
590 intravenously injected with AAV particles expressing an empty vector or mouse GRP78 8 weeks prior  
591 to CCL<sub>4</sub> administration. Liver injury was assessed by serum ALT and AST levels.  $n = 5$  mice. Data are  
592 presented as means  $\pm$  SEM. \* $P < 0.05$ , \*\* $P < 0.01$ , \*\*\* $P < 0.001$ .  $P$ -values were determined by two  
593 tailed  $t$ -test.

594 **Fig. 6 Hepatocyte IL-24 inversely correlates with liver function and CHOP expression in patients.**

595 (A) Immunohistological staining of IL-24 and CHOP in the liver tissues from healthy donors ( $n = 9$ ),  
596 cirrhosis ( $n = 9$ ) and acute ALF ( $n = 22$ ) patients. Scale bar, 100  $\mu$ m. (B) Quantification of IL-24 protein  
597 levels in (A), as represented in median integrated optical density (IOD) value. (C) IL-24 mRNA levels in  
598 the human liver tissues indicated in (A), as assessed by qRT-PCR. Results are normalized to  $\beta$ -actin.

599  $n = 9-22$  patients. (D, E) Pearson correlation analysis between liver IL-24 protein level and serum ALT  
600 level (D) or liver CHOP protein level (E).  $n = 22$ . (F) Immunoblotting of IL-24, P-eIF2 $\alpha$  and CHOP in the  
601 liver tissues from healthy donors and acute ALF patients.  $n = 9$  patients. Data are presented as means  
602  $\pm$  SEM. \* $P < 0.05$ , \*\* $P < 0.01$ .  $P$ -values were determined by two tailed  $t$ -test.

603 **Fig. 7 Schematic model showing the interaction between cytoplasmic IL-24 and UPR modulators**  
604 **within hepatocytes.** Hepatocyte ER stress engages sXBP1 for upregulating IL-24 transcription, which  
605 in turn improves ER homeostasis and represses CHOP-mediated cell death by harnessing PERK-eIF2 $\alpha$   
606 branch reaction.

607

608

609

610

611

612

613

614

615

616

617

618

619

620

621 **Expanded View Figure Legends**

622 **Expanded View Fig. 1 Determination of the levels of IL-24 and UPR markers during hepatocyte**  
623 **stress.** (A) Protein levels of IL-24 in different mouse tissues as assessed by western blot.  $n = 3$   
624 independent experiments. (B) Mouse liver function was evaluated by measuring serum ALT (left) and  
625 AST (right) levels 0-72 h post CCL<sub>4</sub> injection.  $n = 4$ . (C, D) ATF4, ATF6 and sXBP1 mRNA levels in  
626 CCL<sub>4</sub>-treated mice (C) and Tm-stimulated AML12 cells (D), as evaluated by qRT-PCR at indicated time  
627 points.  $n = 3$  biological replicates. Data are presented as means  $\pm$  SEM. \* $P < 0.05$ , \*\* $P < 0.01$ , \*\*\* $P <$   
628  $0.001$ , \*\*\*\* $P < 0.0001$ .  $P$ -values were determined by two tailed  $t$ -test.

629 **Expanded View Fig. 2 Hepatocyte XBP1 is essential for maintaining IL-24 transcription.** (A)  
630 Alignment of responsive elements for CHOP (boxed) XBP1/ATF6 (red) found in the promoter region of  
631 *Il24*. The base positions of the consensus are indicated 5'→3'. Positions are relative to transcription  
632 initiation site. (B) AML12 cells were transfected with indicated siRNAs or negative control (NC) 24 h  
633 prior to Tm treatment. IL-24 mRNA levels at indicated time points were assessed by qRT-PCR. (C) *Il24*  
634 promoter activity in AML12 cells expressing siRNAs with or without Tm treatment (24 h), as quantified  
635 using luciferase assay. *Renilla* luciferase activity was normalized to firefly activity and presented as  
636 relative luciferase activity.  $n = 3$  biological replicates. (D) Cell viability of Ctrl (*Xbp1<sup>f/w</sup>*) and XBP1 KO  
637 (*Xbp1<sup>f/w</sup>Alb<sup>Cre</sup>*) mouse hepatocytes at indicated time points post Tm treatment was assessed by CCK8  
638 assay.  $n = 3$  independent experiments. (E, F) Protein (E) and mRNA (F) levels of IL-24 in Ctrl (*Xbp1<sup>f/w</sup>*)  
639 and XBP1 KO (*Xbp1<sup>f/w</sup>Alb<sup>Cre</sup>*) mouse hepatocytes at indicated time points post Tm treatment.  $n = 3$   
640 independent experiments (E) or biological replicates (F). Data are presented as means  $\pm$  SEM. \* $P <$   
641  $0.05$ , \*\* $P < 0.01$ , \*\*\* $P < 0.001$ , \*\*\*\* $P < 0.0001$ .  $P$ -values were determined by two tailed  $t$ -test.

642 **Expanded View Fig. 3 IL-24 deficiency exacerbates ER stress-related liver injury.** (A) PCNA

643 staining of the liver tissues from CCL<sub>4</sub>-treated WT and KO mice. Hepatocyte proliferation after CCL<sub>4</sub>-  
644 treatment was assessed by counting PCNA positive cells. Scale bar, 100 μm. (B) IL6, TNFA and IL1A  
645 mRNA levels in the liver tissues from vehicle or CCL<sub>4</sub>-treated WT and IL-24 KO mice. *n* = 3 mice. (C-  
646 E) Sex- and age-matched WT and IL-24-null mice were orally treated with vehicle or APAP (500 mg/kg).  
647 (C) Mouse liver function was assessed by measuring serum ALT (left) and AST (right) levels. *n* = 5-8.  
648 (D) Mouse survival rate after APAP-treatment was determined via Log-rank (Mantel-Cox) analysis. *n* =  
649 9-10. (E) H&E and TUNEL staining of the liver tissues from APAP-treated WT and IL-24-null mice. *n* =  
650 5-8. Scale bar, 100 μm. Data are presented as means ± SEM. \**P* < 0.05, \*\**P* < 0.01, \*\*\**P* < 0.001. *P*-  
651 values were determined by two tailed *t*-test.

652 **Expanded View Fig. 4 Extracellular IL-24 does not affect liver function.** Recombinant IL-24 (rIL-24)  
653 (5 μg per mouse) was intraperitoneally treated one hour prior to CCL<sub>4</sub> administration. (A) Mouse liver  
654 function was assessed by measuring serum ALT (left) and AST (right) levels. *n* = 6 mice. (B) H&E and  
655 TUNEL staining of the liver tissues from Vehicle or rIL-24-pre-treated mice. Scale bar, 100 μm. (C) P-  
656 PERK and CHOP protein levels in Vehicle or recombinant IL-24-pre-treated mice as evaluated by  
657 western blot at indicated time points. *n* = 3 independent experiments. Data are presented as means ±  
658 SEM. \*\**P* < 0.01, \*\*\**P* < 0.001. *P*-values were determined by two tailed *t*-test.

659 **Expanded View Fig. 5 Intrinsic IL-24 reduces Tm-induced hepatocyte apoptosis.** (A, B) Ratios of  
660 early and late phases of apoptosis in AML12 cells expressing different levels of IL-24 with or without  
661 Tm treatment, as evaluated by Annexin V-PI staining. Data are presented as means ± SEM. \**P* < 0.05,  
662 \*\*\**P* < 0.001, \*\*\*\**P* < 0.0001. *P*-values were determined by two tailed *t*-test.

663 **Expanded View Fig. 6 Hepatocyte IL-24 attenuates PERK-eIF2α-CHOP branch reaction.** (A) P-  
664 PERK, P-eIF2α, CHOP and GRP78 protein levels in Tm-stimulated control and IL-24 OE AML12 cells,

665 as assessed by western blot.  $n = 3$  independent experiments. (B) CHOP (upper) and ATF4 (lower)  
666 mRNA levels in Tm-stimulated control and IL-24 OE AML12 cells, as evaluated by qRT-PCR at  
667 indicated time points.  $n = 3$  biological replicates. (C) CHOP and GRP78 protein levels in APAP-treated  
668 WT and IL-24 KO mice, as evaluated by western blot at indicated time points.  $n = 3$  independent  
669 experiments. (D) Bim, TRIB3 and Bcl2 mRNA levels in the liver tissues from vehicle or CCL<sub>4</sub>-treated  
670 WT and IL-24 KO mice.  $n = 3$  independent experiments. (E) P-IRE1 $\alpha$  and ATF6 protein levels in CCL<sub>4</sub>-  
671 treated WT and IL-24 KO mice, as evaluated by western blot at indicated time points.  $n = 3$  independent  
672 experiments. (F) P-PERK and CHOP protein levels in CCL<sub>4</sub>-treated AML12 cells, as evaluated by  
673 western blot at indicated time points.  $n = 3$  independent experiments. Data are presented as means  $\pm$   
674 SEM.  $**P < 0.01$ ,  $***P < 0.001$ .  $P$ -values were determined by two tailed  $t$ -test.

675 **Expanded View Fig. 7 GRP78 compensates the anti-stress function of hepatocyte IL-24.** (A)  
676 Immunoblotting of PERK in the precipitates obtained by immunoprecipitation of endogenous GRP78 in  
677 indicated AML12 cells.  $n = 3$  independent experiments. (B) IL-24 KO mice were intravenously injected  
678 with AAV particles expressing an empty vector or mouse GRP78 8 weeks prior to CCL<sub>4</sub> administration.  
679 Liver injury was assessed by TUNEL positive cell ratios.  $n = 5$  mice. Scale bar, 100  $\mu$ m. (C)  
680 Immunoblotting of P-PERK and CHOP in the liver tissues from CCL<sub>4</sub>-exposed IL-24 KO mice with or  
681 without GRP78 overexpression.  $n = 3$  independent experiments. Data are presented as means  $\pm$  SEM.  
682  $**P < 0.01$ .  $P$ -values were determined by two tailed  $t$ -test.

# Fig. 1

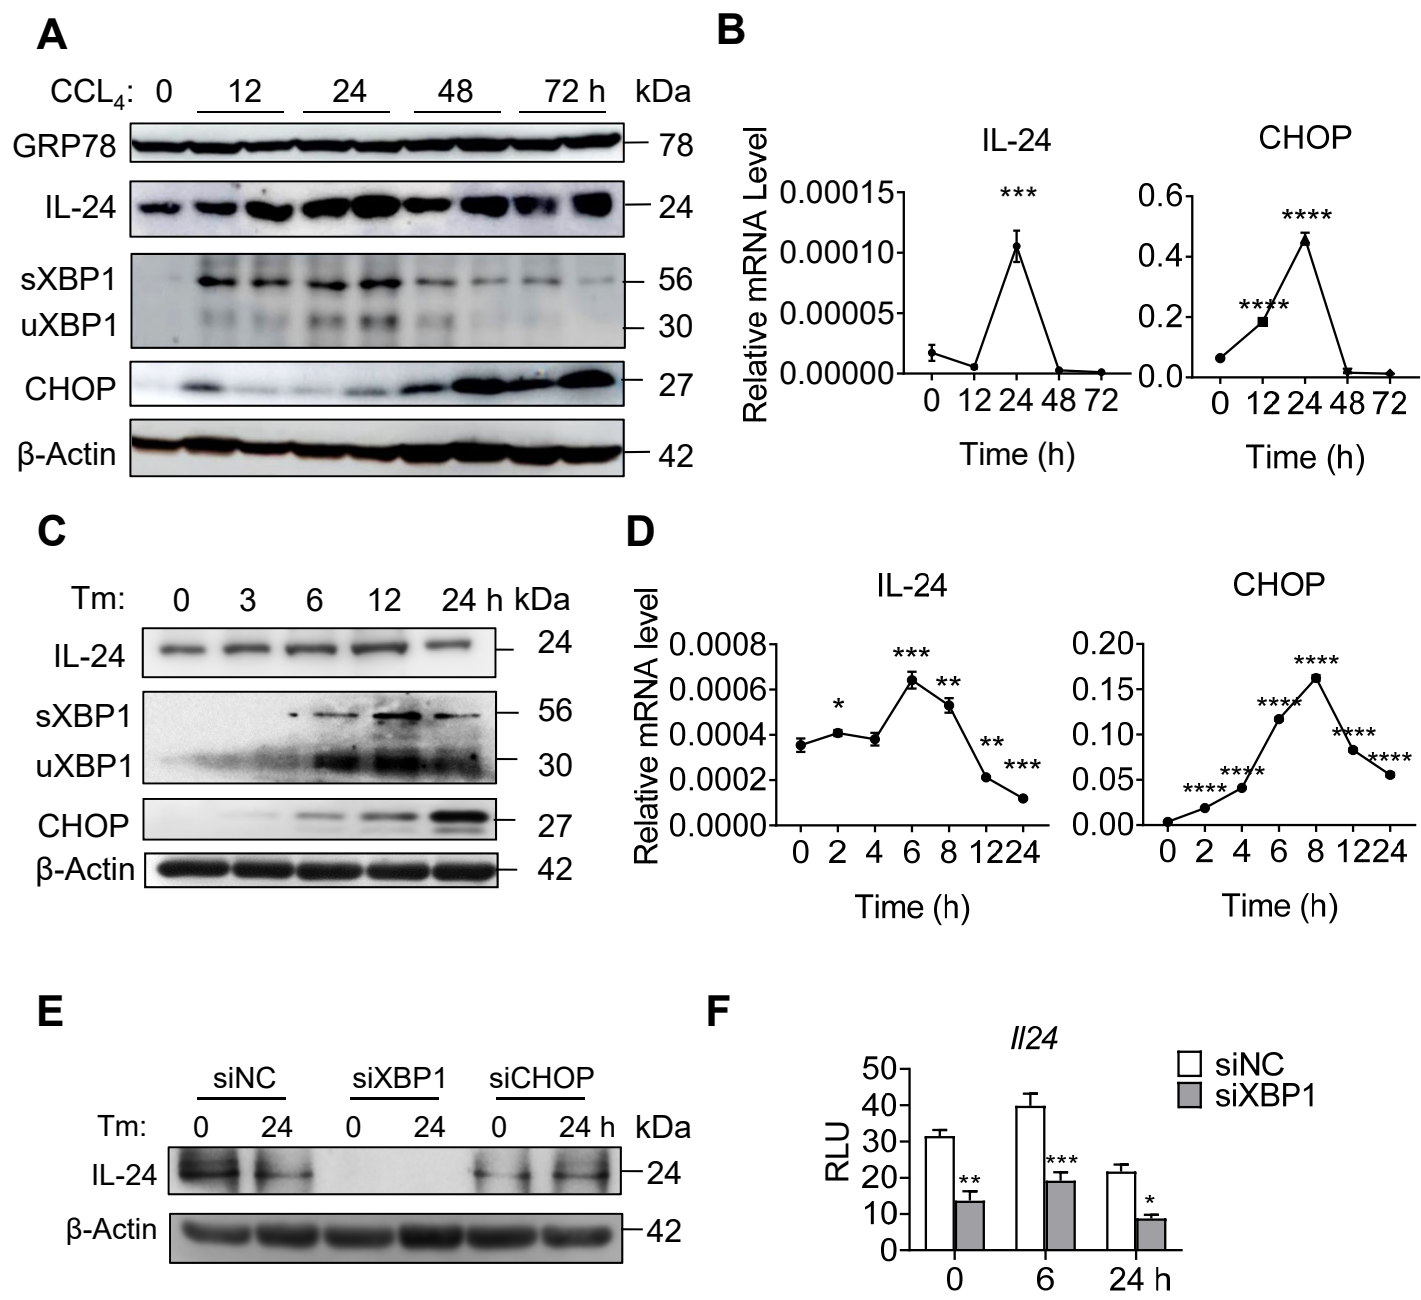

**Fig. 2**

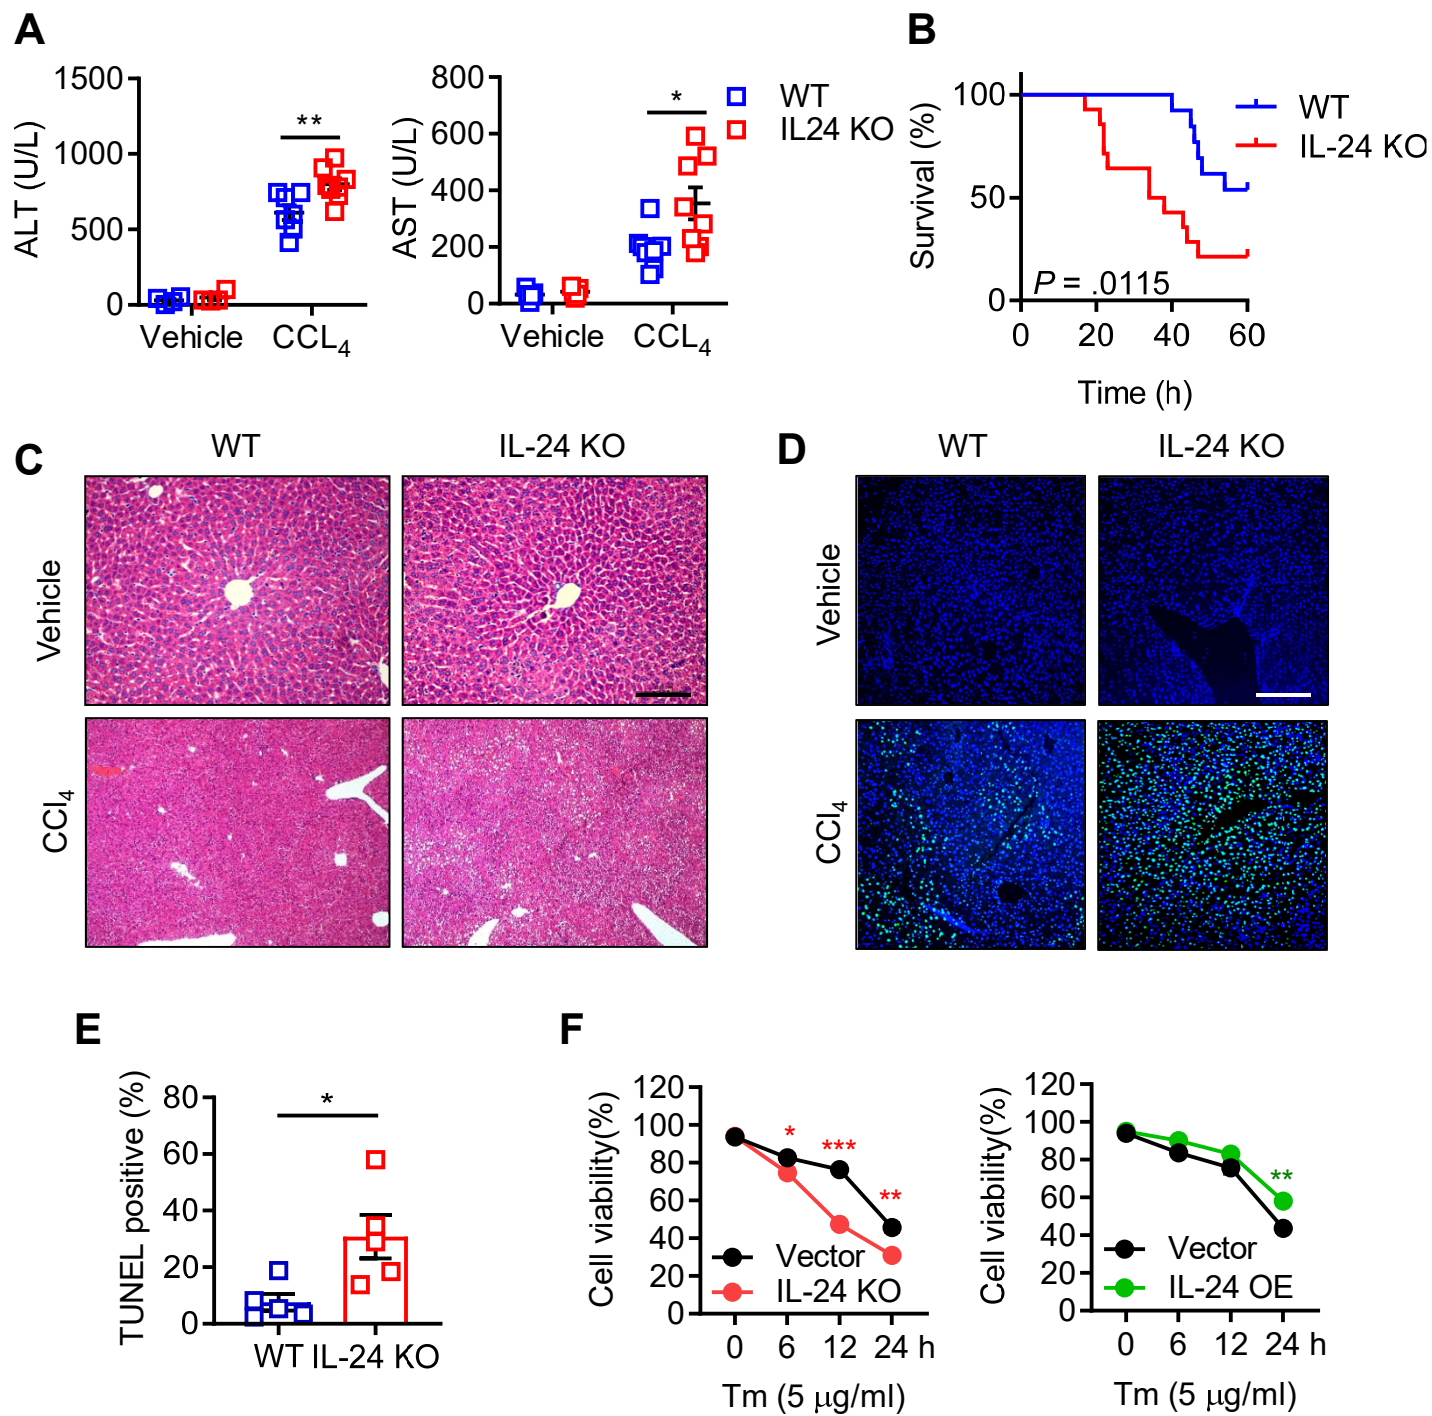

### Fig. 3

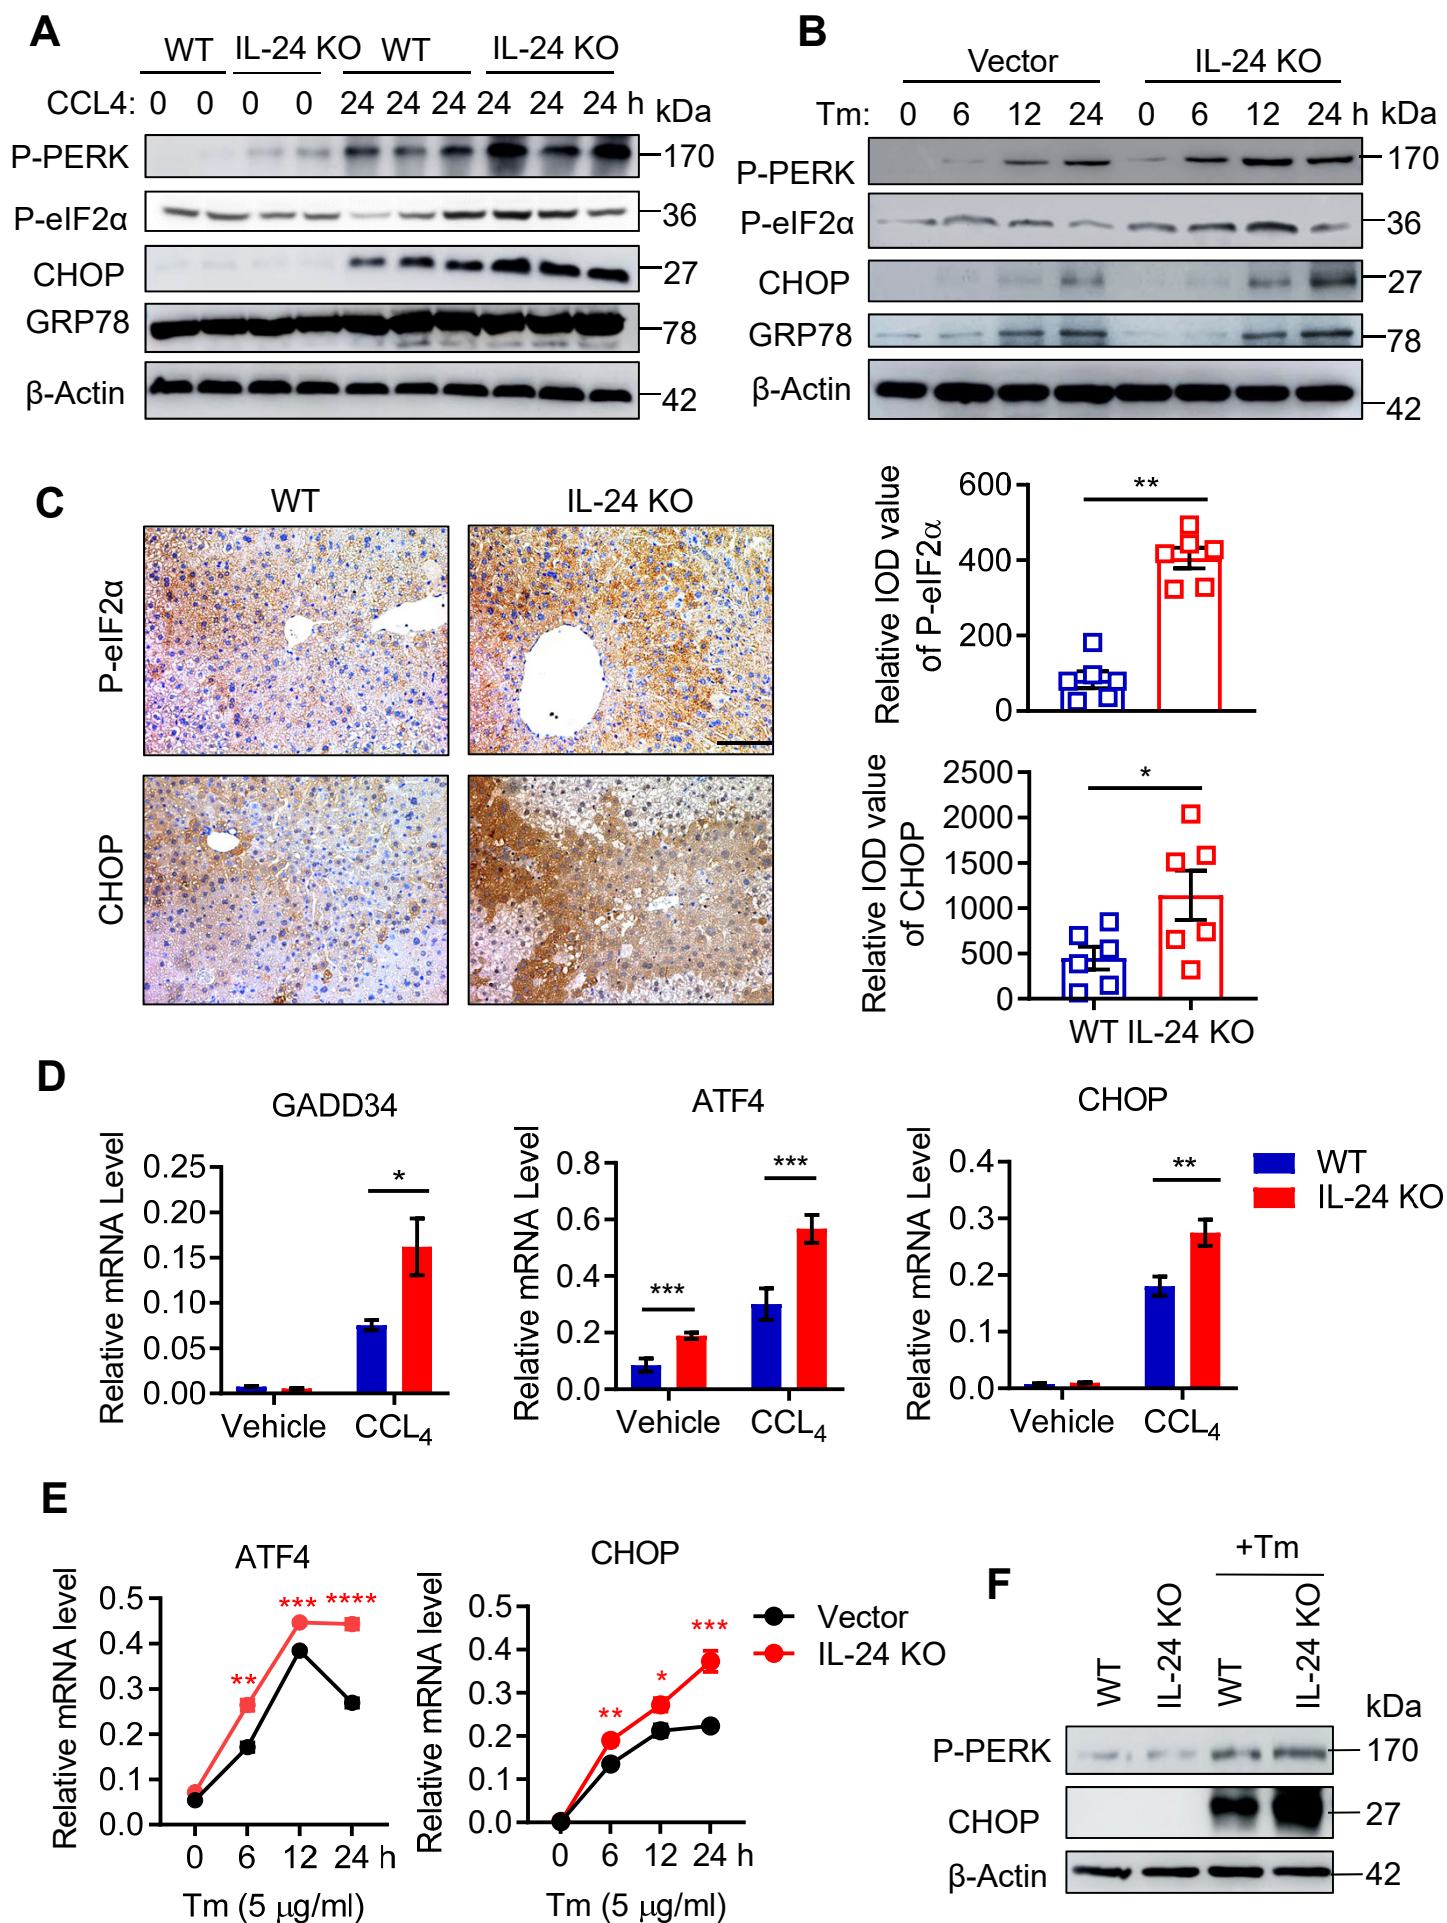



**Fig. 4**

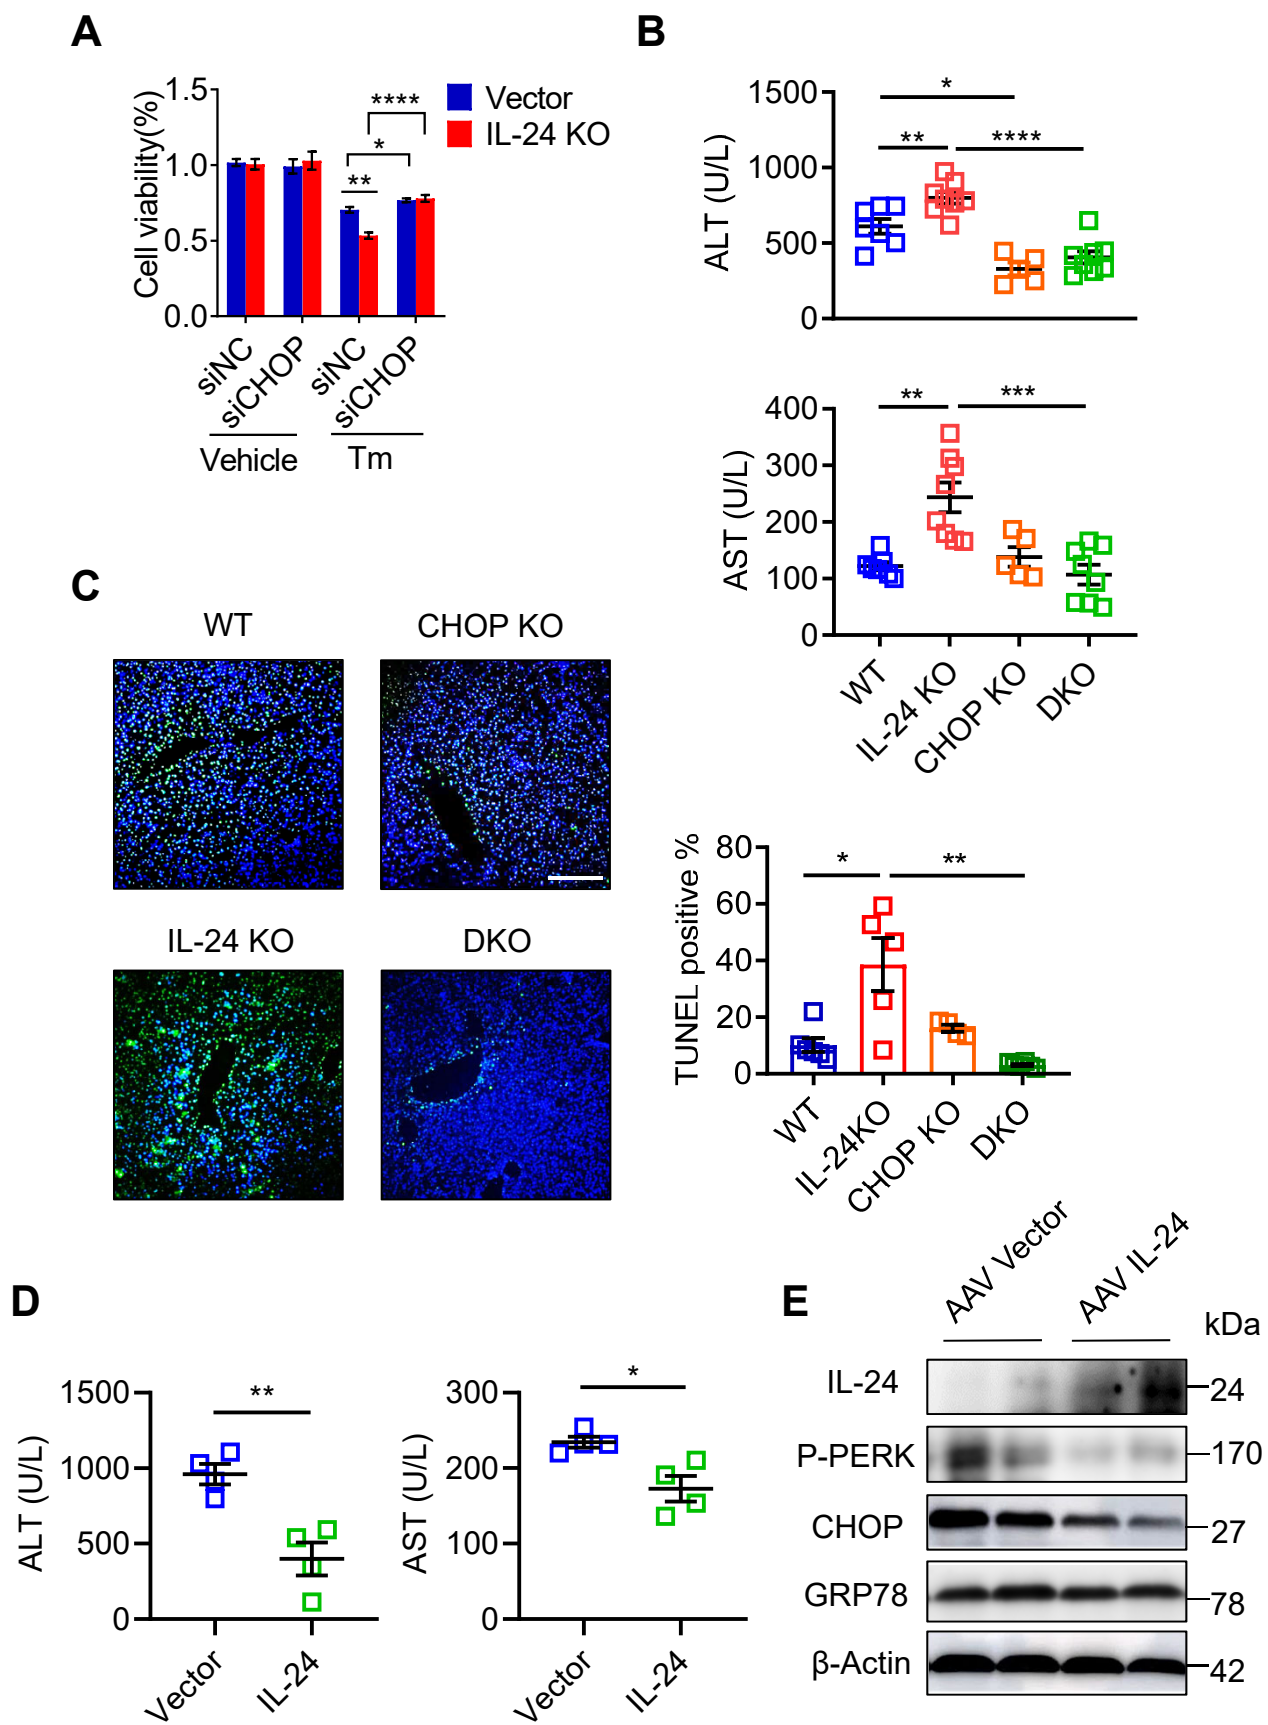

## Fig. 5

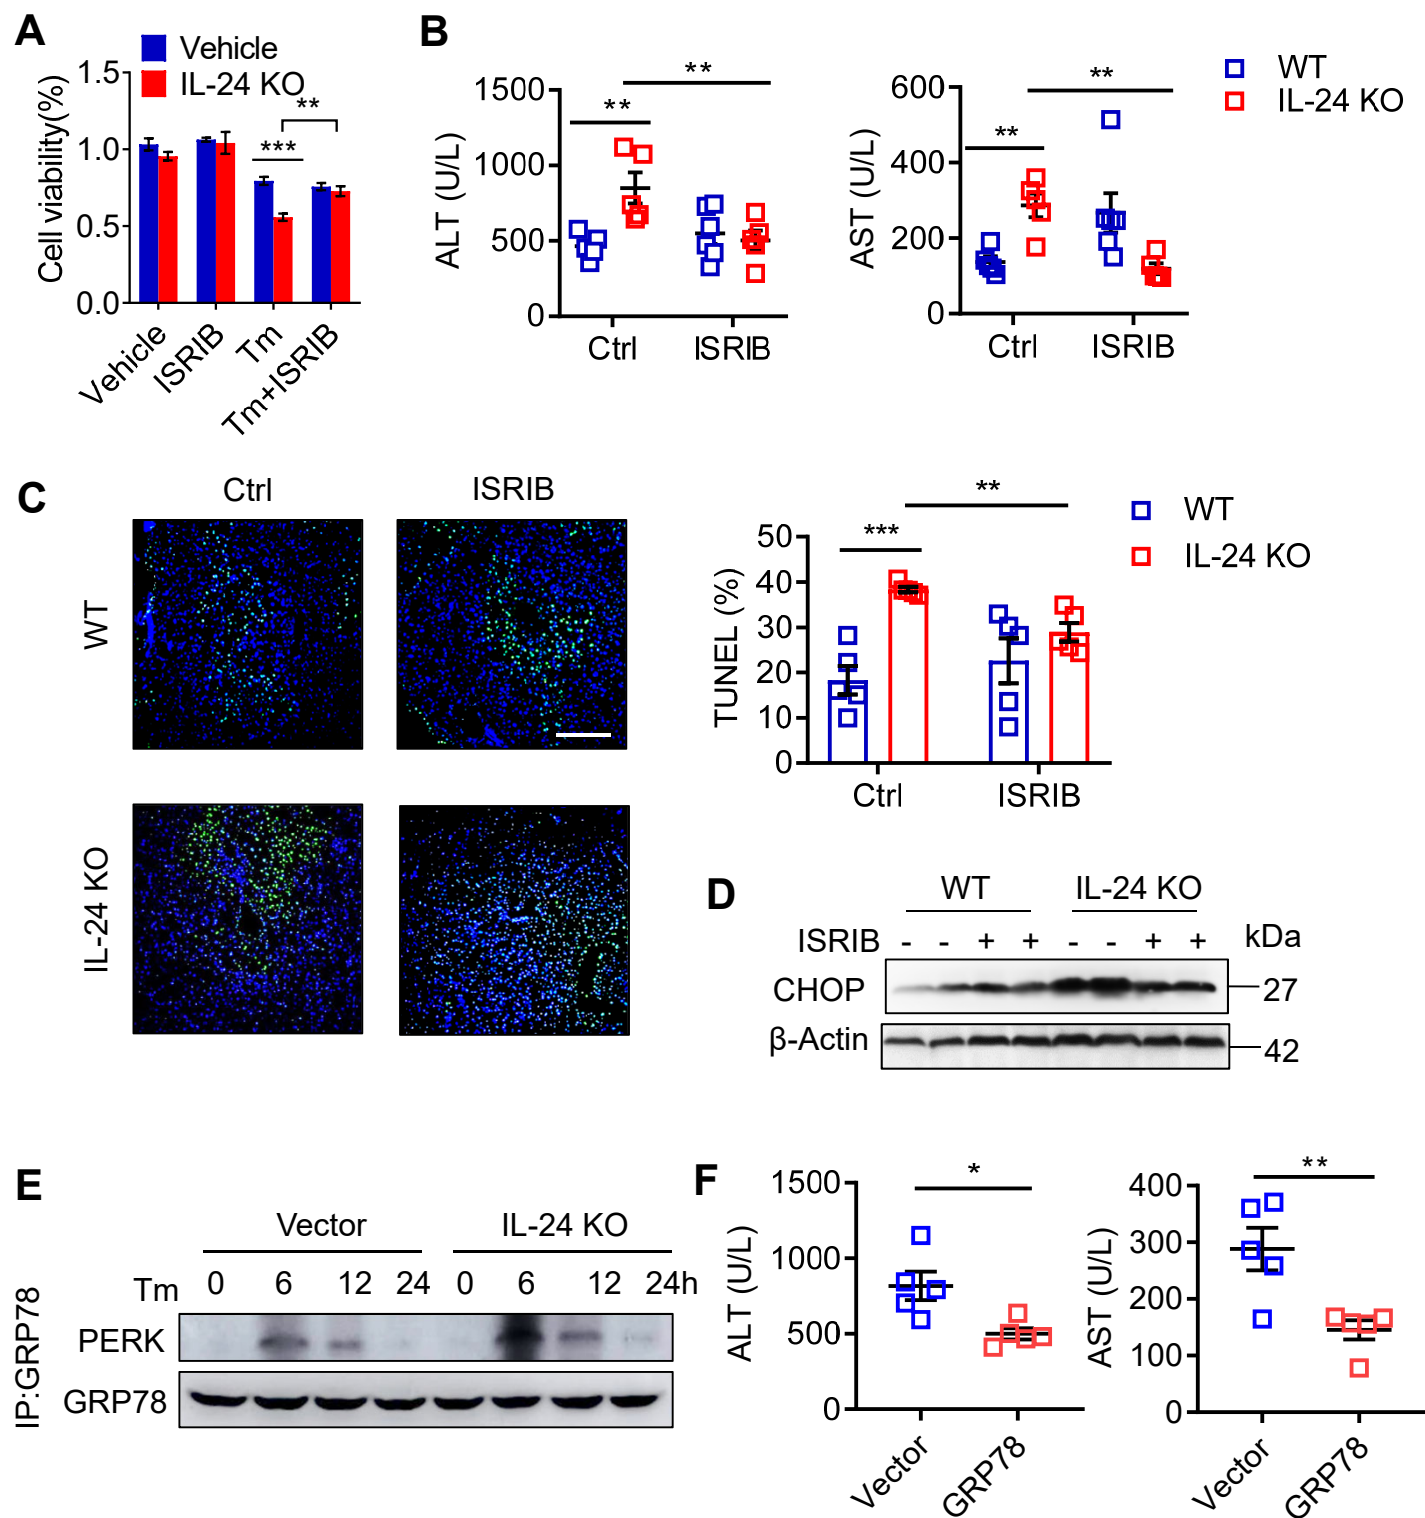

**Fig. 6**

**A**

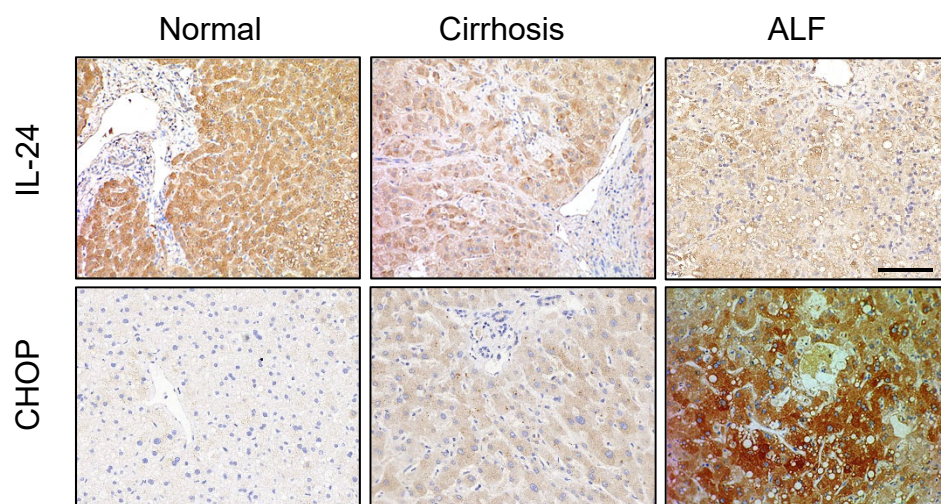

**B**

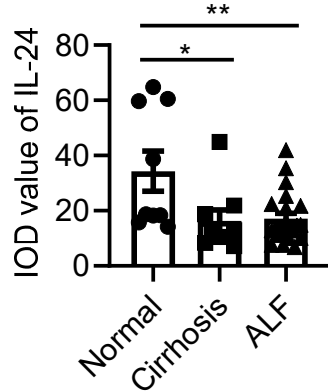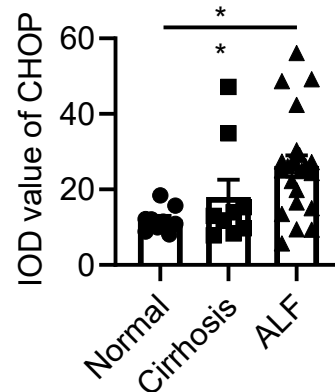

**C**

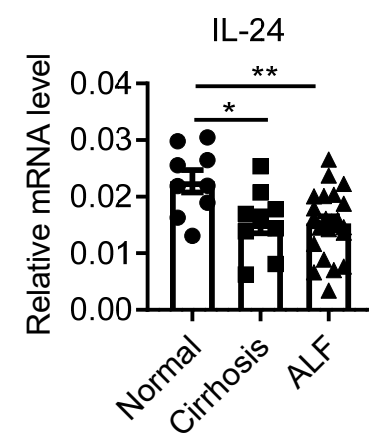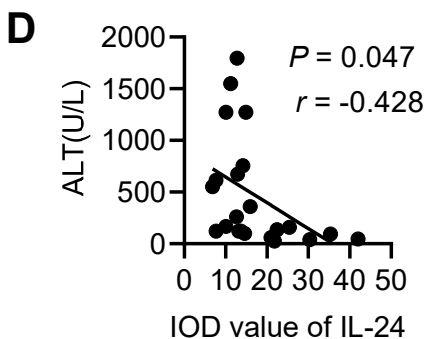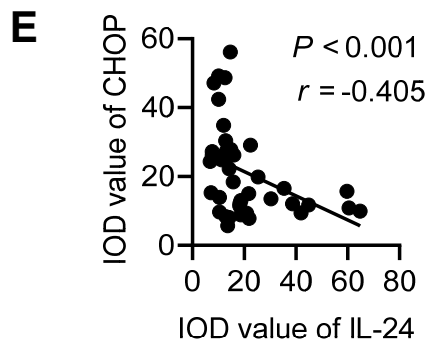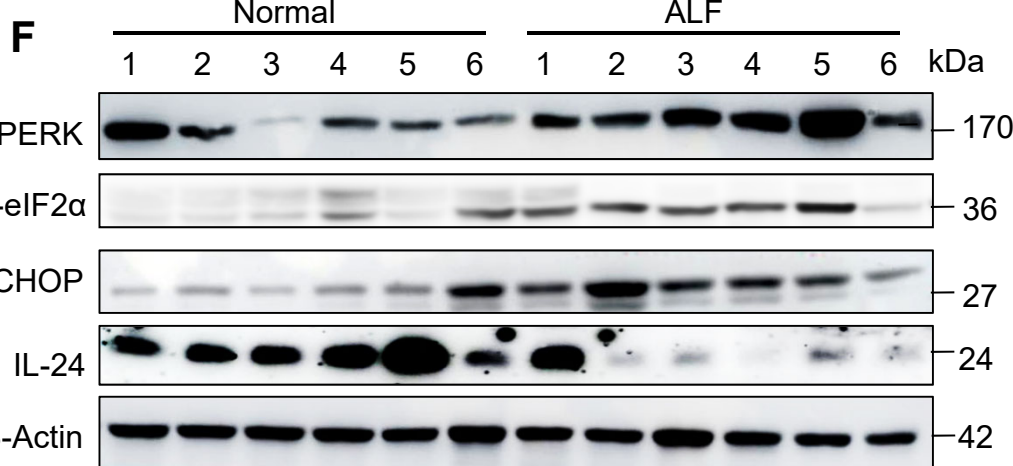

**Fig. 7**

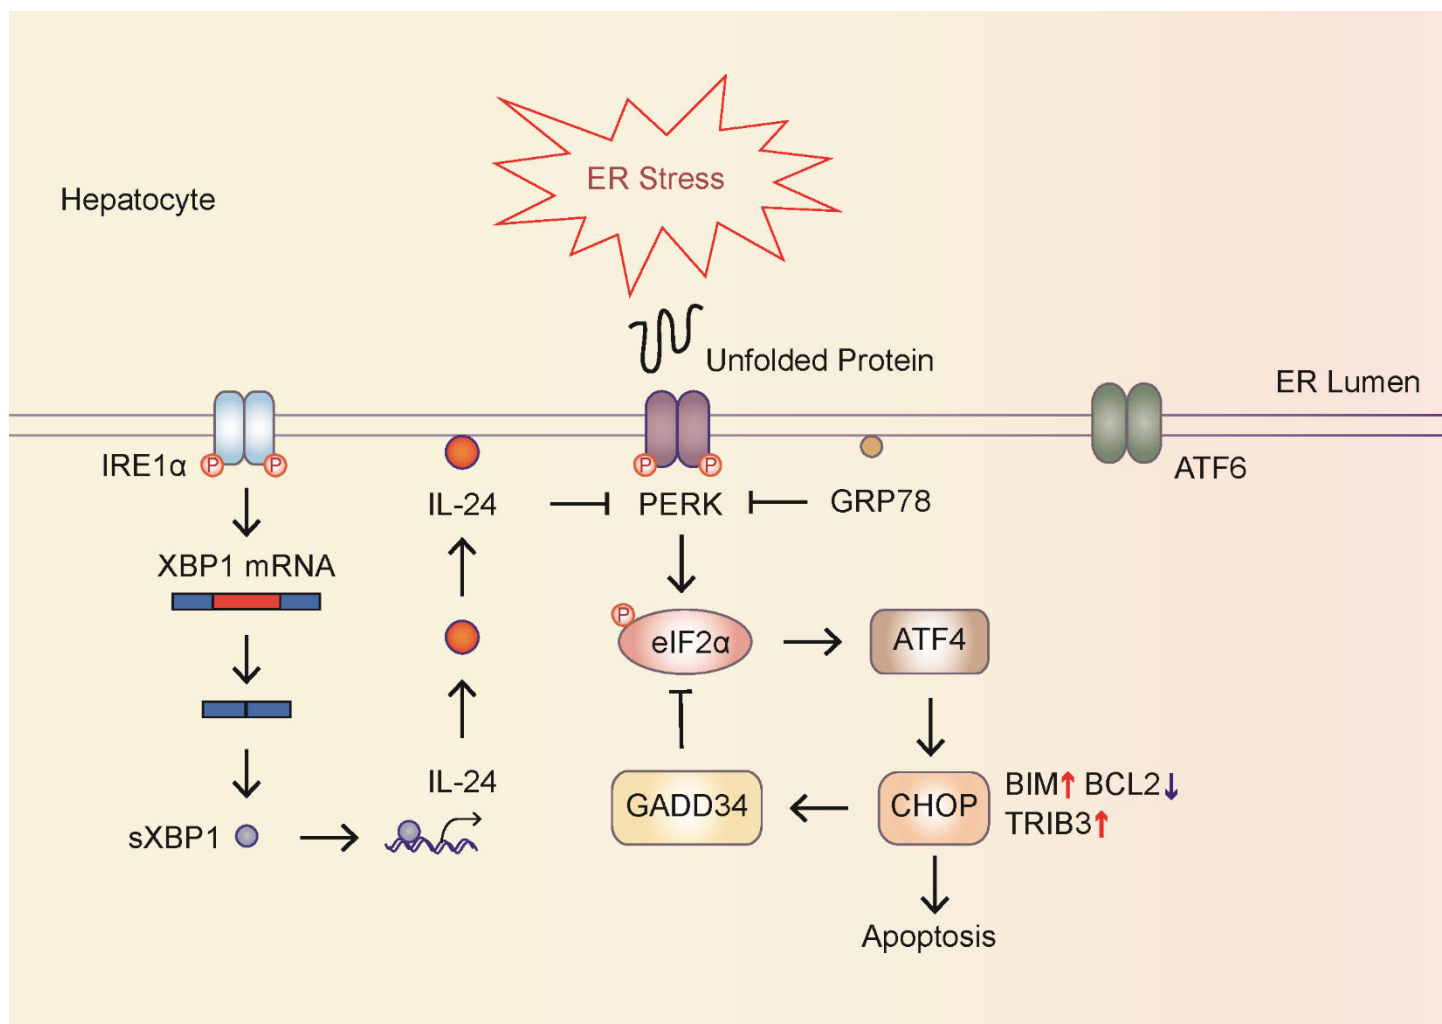

Source: https://www.biorxiv.org/content/10.1101/658666v1.full.pdf
